# Supplementary material
Source: publisher figshare collection journal article supplement (https://acs.figshare.com/ndownloader/files/4646233)
Supplement: Supplementary file 1 [file 4646233]

# A New Sparteine Surrogate for Asymmetric Deprotonation of *N*-Boc Pyrrolidine

*Darren Stead, Peter O'Brien\* and Adam J. Sanderson*

Department of Chemistry, University of York, Heslington, York YO10 5DD, U.K.

Eli Lilly and Co. Ltd, Lilly Research Centre, Erl Wood Manor, Sunninghill Rd,

Windlesham, Surrey, GU20 6PH, U.K.

paobl@york.ac.uk

**Supporting Information Available:** Full experimental procedures and characterisation data.

## **Table of contents:**

S2 General

S3 Full experimental procedures and characterisation data

S24 Representative GC/HPLC data

S32 References for supporting information

## General

Water is distilled water. Where necessary, solvents were dried on a MBraun SPS solvent purification system or distilled before use. Et<sub>2</sub>O and THF were freshly distilled from sodium and benzophenone. *s*-BuLi was titrated against *N*-benzylbenzamide or by acid/base double titration before use. Petrol refers to the fraction of petroleum ether with a boiling point range of 40-60 °C. Diamines used in lithiation reactions were distilled from CaH<sub>2</sub> before use. All reactions were carried out under oxygen-free nitrogen or argon using oven-dried and/or flame dried glassware. Flash column chromatography was carried out using Fluka Silica gel 60 (0.035-0.070 mm particle size). Thin layer chromatography was carried using Merck F<sub>254</sub> aluminium-backed silica plates. For Kügelrohr distillations, the oven temperatures are quoted.

Proton (270 MHz or 400 MHz) and carbon (100.6 MHz) NMR spectra were recorded on a Jeol EX 270 or a Joel ECX-400 instrument using an internal deuterium lock. All samples were recorded in CDCl<sub>3</sub>. Chemical shifts are quoted in parts per million and referenced to CHCl<sub>3</sub> (7.27 for <sup>1</sup>H NMR and 77.0 for <sup>13</sup>C NMR spectroscopy). Carbon NMR spectra were recorded with broadband proton decoupling and were assigned using DEPT and HSQC experiments. Infra-red spectra were recorded on an ATI Matteson Genesis FT-IR spectrometer. Chemical ionisation and high resolution mass spectra were recorded on a Fisons Analytical (VG) Autospec spectrometer. Electrospray ionisation low and high resolution mass spectra were recorded on a Bruker Daltonics micrOTOF spectrometer.

Optical rotations were recorded at rt on a Jasco DIP-370 polarimeter (using the sodium D line; 259 nm) and [α]<sub>D</sub> given in units of 10<sup>-1</sup> deg cm<sup>3</sup> g<sup>-1</sup>. Chiral stationary phase HPLC was performed on one of three systems: a Gilson system with 712 controller software and a 118 UV/Vis diode array detector or on a Waters system with a Waters 255 pump and a Waters 2487 UV detector or an Agilent 1200 series chromatograph using the column indicated for individual compounds. Chiral stationary phase GC was performed on either an Agilent 6890 gas chromatograph using the column indicated for individual compounds or a Perkin Elmer Autosystem XL gas chromatograph. Melting points were measured on a Gallenkamp melting point apparatus.

## Full experimental procedures and characterisation data

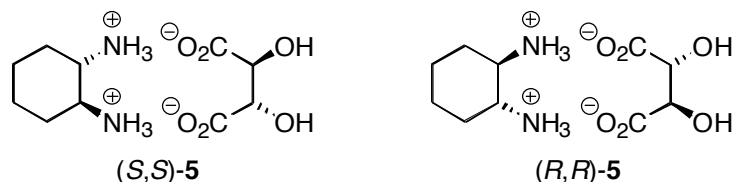

### **(1*S*,2*S*)-Cyclohexane-1,2-diamine 2,3-dihydroxysuccinate salt (*S,S*)-5 and (1*R*,2*R*)-Cyclohexane-1,2-diamine 2,3-dihydroxysuccinate salt (*R,R*)-5**

*Trans* ( $\pm$ )-1,2 cyclohexane diamine (20.00 mL, 100.00 mmol) was added dropwise to a stirred solution of D-tartaric acid (12.51 g, 50.00 mmol) in water (45 mL) under air, such that the internal temperature did not exceed 70 °C (during this time a white precipitate forms, but this disappears by the point of complete addition). Then, AcOH (5 mL) was added dropwise such that the internal temperature did not exceed 90 °C. The resulting solution was allowed to cool to 5 °C over 4 h and kept at 5 °C for 2 h (refrigerator). The solids were removed by filtration and the filter-cake was washed with cold water ( $\leq$  5 °C, 20 mL) and MeOH (5 x 10 mL) (Washings kept separate). The resulting white solid was sucked dry to give the (1*S*,2*S*) cyclohexane diamine D-tartaric acid salt (*S,S*)-**5** (22.75 g,  $\geq$ 95%,  $\geq$ 99:1 er by chiral shift  $^1\text{H}$  NMR spectroscopy of the TMCDA derivative); mp 283-284 °C (lit.,<sup>1</sup> 280-284 °C). The aqueous filtrate was combined with the aqueous washings and cooled to 0 °C. L-tartaric acid (12.51 g, 50.00 mmol) was then added portionwise to the solution over 5 min. The resulting solution was stirred at 0 °C for 4 h. The solids were removed by filtration and the filter-cake was washed with cold water ( $\leq$  5 °C, 20 mL) and MeOH (5 x 10 mL). The resulting white solid was sucked dry to give the (1*R*,2*R*) cyclohexane diamine L-tartaric acid salt (*R,R*)-**5** (19.05 g, 90%,  $\geq$ 99:1 er by chiral shift  $^1\text{H}$  NMR spectroscopy of the TMCDA derivative); 275-276 °C (lit.,<sup>1</sup> 273 °C);  $^1\text{H}$  NMR (400 MHz,  $\text{CDCl}_3$ )  $\delta$  4.16 (s, 2H,  $\text{C}(\text{O})_2\text{CHOH}$ ), 3.22-3.12 (m, 2H, 2 x  $\text{CHNH}_3^+$ ), 2.04-1.92 (m, 2H, 2 x  $\text{CH}_\text{A}\text{H}_\text{B}\text{CHN}$ ), 1.72-1.60 (m, 2H, 2 x  $\text{CH}_\text{A}\text{H}_\text{B}\text{CHN}$ ), 1.41-1.27 (m, 2H, 2 x  $\text{CH}_\text{A}\text{H}_\text{B}\text{CH}_2$ ), 1.25-1.11 (m, 2H, 2 x  $\text{CH}_\text{A}\text{H}_\text{B}\text{CH}_2$ ). Spectroscopic data consistent with that reported in the literature.<sup>1</sup>

The er of each salt was determined by conversion to TMCDA and  $^1\text{H}$  NMR spectroscopy in the presence of 2,2,2 trifluoro-1-(9-anthryl)-ethanol using the following procedure: TMCDA (1 mg) was dissolved in  $\text{CDCl}_3$  (0.2 mL) in a NMR sample tube, and to this a solution of (*R*)-(-)-2,2,2-trifluoro-1-(9-

anthryl)-ethanol (2.8 mg) in  $\text{CDCl}_3$  (0.3 mL) was added.  $^1\text{H}$  NMR spectroscopy then gave the er of TMCDAs and hence tartaric acid salt **5**.

**(1*R*,2*R*)-*N*<sup>1</sup>,*N*<sup>2</sup>-Dimethylcyclohexane-1,2-diamine (*R,R*)-6**

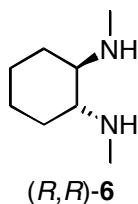

A solution of NaOH (12.24 g, 306.0 mmol) in water (20 mL) and methylchloroformate (6.20 mL, 80.34 mmol) were simultaneously added to a stirred suspension of L-tartaric acid salt (*R,R*)-**5** (10.01 g, 37.9 mmol) in toluene (50 mL) at 0 °C under air. This led to the formation of a gel-like precipitate. The resulting mixture was stirred at rt for 48 h. Then,  $\text{CHCl}_3$  (50 mL) was added and the solids were removed by filtration and washed with  $\text{CHCl}_3$  (2 x 25 mL). Water (25 mL) was added to the filtrate and the two layers were separated. The aqueous layer was extracted with  $\text{CHCl}_3$  (2 x 50 mL). The combined organics were dried ( $\text{K}_2\text{CO}_3$ ) and evaporated under reduced pressure to give the crude carbamate (8.69 g,  $\geq 99\%$  crude yield,  $\geq 95\%$  purity by  $^1\text{H}$  NMR spectroscopy) as a white solid,  $^1\text{H}$  NMR (400 MHz,  $\text{CDCl}_3$ )  $\delta$  3.63 (s, 6H, 2 x OMe), 3.40-3.36 (m, 2H, 2 x NHCH), 2.09-1.98 (m, 2 H, NHCHCH<sub>2</sub>), 1.78-1.66 (m, 2H, NHCHCH<sub>2</sub>), 1.35-1.11 (m, 4H, CH<sub>2</sub>CH<sub>2</sub>). A solution of the crude carbamate (max. 37.9 mmol) in THF (60 mL) was added dropwise *via* a dropping funnel to a stirred suspension of  $\text{LiAlH}_4$  (7.20 g, 189.6 mmol) in THF (60 mL) at 0 °C under  $\text{N}_2$ . The resulting solution was stirred and heated at reflux for 40 h. Then, the solution was cooled to 0 °C and  $\text{Et}_2\text{O}$  (50 mL) was added, followed by the portionwise addition of  $\text{Na}_2\text{SO}_4 \cdot 10\text{H}_2\text{O}$  (36.0 g). The resulting mixture was then stirred at rt for 1 h. The solids were removed by filtration through a pad of Celite<sup>®</sup> and were washed with 24:1  $\text{CH}_2\text{Cl}_2$ -MeOH (2 x 50 mL). The combined organics were dried ( $\text{K}_2\text{CO}_3$ ) and evaporated under reduced pressure to give crude diamine (*R,R*)-**6** (5.39 g,  $\geq 99\%$  crude yield) as a yellow oil,  $^1\text{H}$  NMR (400 MHz,  $\text{CDCl}_3$ )  $\delta$  2.37 (s, 6H, 2 x NMe), 2.12-2.04 (m, 2H, 2 x NCH), 2.02-1.97 (m, 2H, NCHCH<sub>2</sub>), 1.75-1.64 (m, 2H, NCHCH<sub>2</sub>), 1.27-1.13 (m, 2H, CH<sub>2</sub>), 1.01-

0.84 (m, 2H, CH<sub>2</sub>). Spectroscopic data consistent with that reported in the literature.<sup>3</sup> The crude product was used in the next step without further purification ( $\geq 95\%$  purity by <sup>1</sup>H NMR spectroscopy).

**(1*R*,2*R*)-*N*<sup>1</sup>,*N*<sup>2</sup>-Dimethyl-*N*<sup>1</sup>,*N*<sup>2</sup>-bis(3,3-dimethylbutyl)cyclohexane-1,2-diamine (*R,R*)-4**

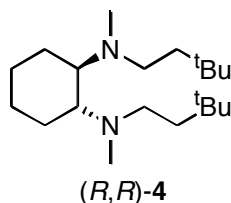

A solution of *t*-butylacetylchloride (10.76 mL, 77.5 mmol) in CH<sub>2</sub>Cl<sub>2</sub> (20 mL) was added dropwise to a stirred biphasic mixture of crude diamine (*R,R*)-6 (max. 37.9 mmol) in CH<sub>2</sub>Cl<sub>2</sub> (50 mL) and NaOH (7.06 g, 176.5 mmol) in water (25 mL) at 0 °C under air. The resulting mixture was stirred at rt for 40 h. The two layers were separated and the aqueous layer was extracted with CH<sub>2</sub>Cl<sub>2</sub> (5 x 100 mL). The combined organic extracts were dried (K<sub>2</sub>CO<sub>3</sub>) and evaporated under reduced pressure to give the bis-amide as a white solid. A solution of the crude bis-amide in THF (60 mL) was added dropwise *via* a dropping funnel to a stirred suspension of LiAlH<sub>4</sub> (7.20 g, 189.6 mmol) in THF (60 mL) at 0 °C under N<sub>2</sub>. The resulting solution was stirred and heated at reflux for 40 h. Then, the solution was cooled to 0 °C and Et<sub>2</sub>O (50 mL) was added, followed by the portionwise addition of Na<sub>2</sub>SO<sub>4</sub>·10H<sub>2</sub>O (36.0 g). The resulting mixture was then stirred at rt for 1 h. The solids were removed by filtration through a pad of Celite<sup>®</sup> and washed with 24:1 CH<sub>2</sub>Cl<sub>2</sub>-MeOH (2 x 50 mL). The combined organic extracts were dried (K<sub>2</sub>CO<sub>3</sub>) and evaporated under reduced pressure to give the crude product as a yellow oil. Purification by Kugelrohr distillation gave diamine (*R,R*)-6 (8.42 g, 72% over 4 steps) as a colourless oil, bp 180-190 °C/1.5 mm Hg (lit.,<sup>2</sup> 150 °C/1.0 mm Hg); [α]<sub>D</sub> -38.1 (*c* 1.0 in CHCl<sub>3</sub>) (lit.,<sup>3</sup> [α]<sub>D</sub> -31.1 (*c* 1.02 in CHCl<sub>3</sub>)); <sup>1</sup>H NMR (400 MHz, CDCl<sub>3</sub>) δ 2.58-2.36 (m, 6H, 2 x NCH<sub>2</sub> and 2 x NCH), 2.25 (s, 6H, 2 x NMe), 1.83-1.63 (m, 4H, 2 x NCHCH<sub>2</sub>), 1.39 (t, *J* = 8.0 Hz, 4 H, 2 x CH<sub>2</sub>CMe<sub>3</sub>), 1.20-1.06 (m, 4H, 2 x CH<sub>2</sub>), 0.90 (s, 18 H, 2 x CMe<sub>3</sub>); <sup>13</sup>C NMR (100.6 MHz, CDCl<sub>3</sub>) δ 62.6 (NCH), 50.1 (NCH<sub>2</sub>), 42.2 (CH<sub>2</sub>CMe<sub>3</sub>), 37.0 (NMe), 29.8 (CMe<sub>3</sub>), 29.6 (CMe<sub>3</sub>), 25.9 (CH<sub>2</sub>), 25.1 (CH<sub>2</sub>), Spectroscopic data consistent with that reported in the literature.<sup>3</sup>

**(1*R*,2*R*)-*N*<sup>1</sup>,*N*<sup>2</sup>-Diisopropyl-*N*<sup>1</sup>,*N*<sup>2</sup>-dimethylcyclohexane-1,2-diamine (*R,R*)-2**

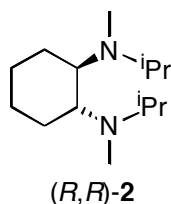

Acetone (206  $\mu$ L, 2.82 mmol) was added to a stirred solution of diamine (*R,R*)-6 (104 mg, 0.73 mmol) in  $\text{CH}_2\text{Cl}_2$  (3 mL) at rt under  $\text{N}_2$ . The resulting solution was stirred at rt for 5 min and  $\text{NaBH}(\text{OAc})_3$  (604 mg, 2.83 mmol) was added portionwise over 5 min. The resulting mixture was stirred at rt for 16 h. Then, water (5 mL) and  $\text{CH}_2\text{Cl}_2$  (5 mL) were added and the two layers were separated. The aqueous layer was extracted with  $\text{CH}_2\text{Cl}_2$  (4 x 5 mL) and the combined organic extracts were dried ( $\text{MgSO}_4$ ) and evaporated under reduced pressure to give the crude product as a colourless oil. A solution of the crude product in toluene (1 mL) was added to a solution of HCl in EtOH (prepared by adding acetyl chloride (61  $\mu$ L, 0.88 mmol) to EtOH (389  $\mu$ L)) at 0 °C. Petrol was then added until a cloudy solution resulted. After 1 h at 0 °C, the solid was collected by filtration and washed with petrol (2 x 2 mL). The solid was dissolved in hexane (5 mL) and 2 M  $\text{NaOH}_{(\text{aq})}$  (5 mL) was added and the two layers were separated and the aqueous layer was extracted with hexane (4 x 5 mL) and the combined organic extractss were dried ( $\text{MgSO}_4$ ) and evaporated under reduced pressure to give diamine (*R,R*)-2 (122 mg, 74%) as a colourless oil,  $^1\text{H}$  NMR (400 MHz,  $\text{CDCl}_3$ )  $\delta$  2.93 (septet,  $J$  = 6.5 Hz, 2 H, 2 x  $\text{NCHMe}_2$ ), 2.65-2.56 (m, 2H, 2 x NCH), 2.20 (s, 6H, 2 x NMe), 1.81-1.71 (m, 2H, 2 x  $\text{NCHCH}_\text{A}\text{H}_\text{B}$ ), 1.14-1.07 (m, 2H,  $\text{CH}_2$ ), 1.06 (d,  $J$  = 6.5 Hz, 6H,  $\text{CHMe}_2$ ), 1.02 (d,  $J$  = 6.5 Hz, 6H  $\text{CHMe}_2$ ). Spectroscopic data consistent with that reported in the literature.<sup>4</sup> Diamine (*R,R*)-2 was purified by Kugelrohr distillation before use: bp 180 °C/1.5 mm/Hg.

**(1*R*,2*R*)-*N*<sup>1</sup>,*N*<sup>2</sup>-Dimethyl-*N*<sup>1</sup>,*N*<sup>2</sup>-dineopentylcyclohexane-1,2-diamine (*R,R*)-3**

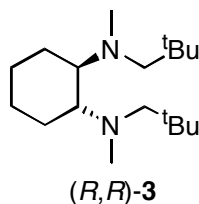

Trimethylacetaldehyde (1.93 mL, 17.80 mmol) was added to a stirred solution of diamine (*R,R*)-6 (623 mg, 4.39 mmol) in CH<sub>2</sub>Cl<sub>2</sub> (25 mL) at rt under N<sub>2</sub>. The resulting solution was stirred at rt for 5 min and NaBH(OAc)<sub>3</sub> (3.77 g, 17.80 mmol) was added portionwise over 5 min. The resulting mixture was stirred at rt for 16 h. Then, water (30 mL) and CH<sub>2</sub>Cl<sub>2</sub> (20 mL) were added and the two layers were separated and the aqueous layer was extracted with CH<sub>2</sub>Cl<sub>2</sub> (4 x 50 mL) and the combined organic extracts were dried (MgSO<sub>4</sub>) and evaporated under reduced pressure to give the crude product as a colourless oil. A solution of the crude product in toluene (5 mL) was added to a solution of HCl in EtOH (prepared by adding acetyl chloride (364 μL, 5.18 mmol) to EtOH (2.3 mL)) at 0 °C. Petrol was then added until a cloudy solution resulted. After 1 h at 0 °C, the solid was collected by filtration and washed with petrol (2 x 5 mL). The solid was dissolved in hexane (20 mL) and 2 M NaOH<sub>(aq)</sub> (20 mL) was added and the two layers were separated and the aqueous layer was extracted with hexane (4 x 20 mL) and the combined organic extractss were dried (MgSO<sub>4</sub>) and evaporated under reduced pressure to give diamine (*R,R*)-3 (777 mg, 63%) as a colourless oil, <sup>1</sup>H NMR (400 MHz, CDCl<sub>3</sub>) δ 2.37-2.32 (m, 2H, 2 x NCH), 2.34-2.30 (m, 4H, CH<sub>2</sub>CMe<sub>3</sub>), 2.29 (s, 6H, 2 x NMe), 1.78 (br dt, *J* = 13.5, 3.0 Hz, 2H, NCHCH<sub>A</sub>H<sub>B</sub>), 1.71-1.62 (m, 2H, NCHCH<sub>A</sub>H<sub>B</sub>), 1.29-1.15 (m, 2H, 2 x CH<sub>A</sub>H<sub>B</sub>), 1.10-1.01 (m, 2H, 2 x CH<sub>A</sub>H<sub>B</sub>), 0.89 (s, 18H, 2 x CMe<sub>3</sub>). Spectroscopic data consistent with that reported in the literature.<sup>2</sup> Diamine (*R,R*)-3 was purified by Kùgelrohr distillation before use: bp 210 °C/2.5 mm/Hg (lit.,<sup>2</sup> 120 °C/1 mm/Hg).

**General Procedure for lithiation/electrophilic trapping of *N*-Boc pyrrolidine 7**

*s*-BuLi (1.61 mL of a 1.27 M solution in cyclohexane, 2.04 mmol) was added dropwise to a stirred solution of *N*-Boc pyrrolidine 7 (1.57 mmol) and the diamine (1.75 mmol) in Et<sub>2</sub>O (5 mL) at -78 °C under Ar. The resulting solution was stirred at -78 °C for 3 h. Then, Me<sub>3</sub>SiCl (358 μL, 2.82 mmol) was added

dropwise and the reaction mixture was allowed to warm to rt and stirred at rt for 16 h. Saturated  $\text{NH}_4\text{Cl}_{(\text{aq})}$  (5 mL) was added and the mixture stirred for 20 min at rt. The two layers were separated and the aqueous layer was extracted with  $\text{Et}_2\text{O}$  (5 x 5 mL). The combined organic extracts were dried ( $\text{MgSO}_4$ ) and evaporated under reduced pressure to give the crude product.

**(S)-2-Trimethylsilylpyrrolidine-1-carboxylic acid *tert*-butyl ester (S)-8**

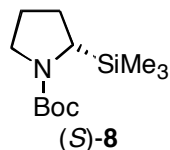

Using the general procedure for lithiation/electrophilic trapping, *s*-BuLi (1.05 mL of a 1.10 M solution in cyclohexane, 1.16 mmol), *N*-Boc pyrrolidine **7** (157  $\mu\text{L}$ , 0.90 mmol), diamine (*R,R*)-**4** (361 mg, 1.16 mmol) and  $\text{Me}_3\text{SiCl}$  (252  $\mu\text{L}$ , 1.98 mmol) after 3 h lithiation in  $\text{Et}_2\text{O}$  (3 mL) gave the crude product as a yellow oil. Purification by flash column chromatography on silica with petrol- $\text{Et}_2\text{O}$  (95:5) as eluent gave pyrrolidine (S)-**8** (166 mg, 72%, 95:5 er by chiral GC) as a colourless oil,  $[\alpha]_{\text{D}}^{20} +76.7$  (*c* 1.0 in  $\text{CHCl}_3$ )(lit.,<sup>5</sup>  $[\alpha]_{\text{D}}^{20} +71.8$  (*c* 2.6 in  $\text{CHCl}_3$ ) for (S)-**8** of 98:2 er);  $R_{\text{F}}$ (95:5 petrol- $\text{Et}_2\text{O}$ ) 0.3;  $^1\text{H}$  NMR (400 MHz,  $\text{CDCl}_3$ )  $\delta$  3.36-3.39 (br m, 1H, NCH), 3.38-3.06 (br m, 2H,  $\text{NCH}_2$ ), 2.12-1.92 (br m, 1H,  $\text{CH}_\text{A}\text{H}_\text{B}$ ), 1.89-1.65 (br m, 3H,  $\text{CH}_\text{A}\text{H}_\text{B}$  and  $\text{CH}_2$ ), 1.47 (s, 9H,  $\text{CMe}_3$ ), 0.06 (s, 9H,  $\text{SiMe}_3$ ); GC: Betadex 120, 30 m x 0.25 mm i.d.( $\beta$ -cyclodextrin) T 91  $^\circ\text{C}$  isothermal, He carrier gas at 12 psi constant pressure, 103 min [(S)-**8**], 105 min [(R)-**8**] and recovered *N*-Boc pyrrolidine **7** (10 mg, 7%) as a colourless oil. Spectroscopic data consistent with that reported in the literature.<sup>5</sup>

Using the general procedure for lithiation/electrophilic trapping, *s*-BuLi (560  $\mu\text{L}$  of a 1.20 M solution in cyclohexane, 0.67 mmol), *N*-Boc pyrrolidine **7** (73  $\mu\text{L}$ , 0.42 mmol) and diamine (*R,R*)-**2** (153 mg, 0.67 mmol) and  $\text{Me}_3\text{SiCl}$  (189  $\mu\text{L}$ , 1.47 mmol) after 3 h lithiation in  $\text{Et}_2\text{O}$  (2 mL) gave the crude product as a yellow oil. Purification by flash column chromatography on silica with petrol- $\text{Et}_2\text{O}$  (95:5) as eluent gave



pyrrolidine (*S*)-**8** (31 mg, 29%, 50:50 er by chiral GC) as a colourless oil and recovered *N*-Boc pyrrolidine **7** (30 mg, 42%) as a colourless oil.

Using the general procedure for lithiation/electrophilic trapping, *s*-BuLi (710  $\mu$ L of a 1.20 M solution in cyclohexane, 0.85 mmol), *N*-Boc pyrrolidine **7** (93  $\mu$ L, 0.53 mmol), diamine (*R,R*)-**3** (239 mg, 0.85 mmol), and Me<sub>3</sub>SiCl (160  $\mu$ L, 1.26 mmol) after 3 h in Et<sub>2</sub>O (2 mL) gave the crude product as a yellow oil. Purification by flash column chromatography on silica with petrol-Et<sub>2</sub>O (95:5) as eluent gave pyrrolidine (*S*)-**8** (4 mg, 4%, 50:50 er by chiral GC) as a colourless oil and recovered *N*-Boc pyrrolidine **7** (47 mg, 51%) as a colourless oil.

### 3-Phenylpropyl *N,N*-diisopropylcarbamate **9**

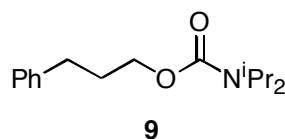

A solution of diisopropylcarbamoyl chloride (2.16 g, 13.21 mmol) in Et<sub>2</sub>O (10 mL) was added dropwise over 10 min to a stirred solution of NaH (579 mg of 60% wt dispersion in mineral oil, 14.47 mmol, pre-washed with Et<sub>2</sub>O (3 x 10 mL)) and 3-phenyl-1-propanol (1.70 mL, 12.58 mmol) in Et<sub>2</sub>O (30 mL) at rt under N<sub>2</sub>. The resulting mixture was stirred at rt for 16 h. Then, 2 M HCl<sub>(aq)</sub> (30 mL) was added and the resulting mixture was stirred vigorously for 5 min. The two layers were separated and the aqueous layer was extracted with Et<sub>2</sub>O (4 x 30 mL). The combined organic extracts were dried (2:1 Na<sub>2</sub>SO<sub>4</sub>-NaHCO<sub>3</sub>) and evaporated under reduced pressure to give the crude product as a yellow oil. Purification by flash column chromatography on silica with petrol-Et<sub>2</sub>O (5:1) as eluent gave carbamate **9** (2.77 g, 84%) as a colourless oil; *R*<sub>f</sub>(5:1 petrol-Et<sub>2</sub>O) 0.35; <sup>1</sup>H NMR (400 MHz, CDCl<sub>3</sub>)  $\delta$  7.33-7.27 (m, 2H, Ph), 7.23-7.17 (m, 3H, Ph), 4.28-3.58 (br m, 2 x NCH), 4.13 (t, *J* = 6.5 Hz, 2H, OCH<sub>2</sub>), 2.73 (t, *J* = 8.0 Hz, 2H, CH<sub>2</sub>Ph), 2.03-1.95 (m, 2H, CH<sub>2</sub>), 1.23 (d, *J* = 7.0 Hz, 12H, 2 x NCHMe<sub>2</sub>); <sup>13</sup>C NMR (100.6 MHz, CDCl<sub>3</sub>)  $\delta$  158.7

(C=O), 141.5 (*ipso*-Ph), 128.4 (Ph), 128.3 (Ph), 125.8 (Ph), 63.9 (OCH<sub>2</sub>), 45.7 (NCH), 32.5 (CH<sub>2</sub>), 30.8 (Me), 21.0 (CH<sub>2</sub>). Spectroscopic data consistent with that reported in the literature.<sup>6</sup>

### Diisopropylcarbamic acid (*S*)-1-hydroxymethyl-3-phenyl-propyl ester (*S*)-10

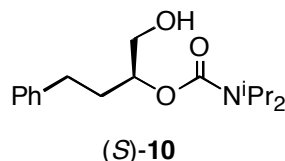

*s*-BuLi (1.38 mL of a 1.12 M solution in cyclohexanes, 1.54 mmol) was added dropwise to a stirred solution of diamine (*S,S*)-**4** (478 mg, 1.54 mmol) in Et<sub>2</sub>O (2 mL) at –78 °C under Ar. After stirring for 30 min at –78 °C, a solution of carbamate **9** (279 mg, 1.06 mmol) in Et<sub>2</sub>O (2 mL) was added dropwise over 1 min. The resulting solution was stirred at –78 °C for 5 h. Then, a stream of CO<sub>2</sub> was bubbled into the solution for 1 h. The solution was then allowed to warm to rt over 10 min. Water (4 mL) and concentrated HCl<sub>(aq)</sub> (1 mL) were added and the two layers were separated. The aqueous layer was extracted with EtOAc (3 x 10 mL) and the combined organic extracts were dried (MgSO<sub>4</sub>) and evaporated under reduced pressure to give the crude acid as a colourless oil. BH<sub>3</sub>·DMS (3.50 mL of a 2 M solution in THF, 7.00 mmol) was added dropwise over 2 min to a stirred solution of the crude acid (max. 1.06 mmol) at 0 °C under Ar. The resulting solution was allowed to warm to rt over 15 min and stirred at rt for 16 h. Then, the solution was cooled to 0 °C and MeOH (20 mL) was added over 10 min. The resulting solution was then stirred at rt for 1 h and then stirred and heated at reflux for 1 h. After being allowed to cool to rt, the solvent was evaporated under reduced pressure to give the crude product as a yellow oil. Purification by flash column chromatography on silica with petrol-EtOAc (1:1) as eluent gave alcohol (*S*)-**10** (259 mg, 84%, 84:16 er by chiral HPLC of the diol obtained after LiAlH<sub>4</sub> reduction) as a white solid, mp 56–57 °C, (lit.,<sup>6</sup> 55–57 °C); *R*<sub>F</sub>(1:1 petrol-EtOAc) 0.3; [α]<sub>D</sub> –20.7 (*c* 1.0 in CHCl<sub>3</sub>); <sup>1</sup>H NMR (400 MHz, CDCl<sub>3</sub>) δ 7.33–7.26 (m, 2H, Ph), 7.24–7.16 (m, 3H, Ph), 4.93–4.84 (m, 1H, CHO), 4.19–4.00 (m, 2H, CHMe<sub>2</sub>), 3.76 (dd, *J* = 12.0, 3.0 Hz, 1H, CH<sub>A</sub>H<sub>B</sub>OH), 3.69 (dd, *J* = 12.0, 3.0 Hz, 1H, CH<sub>A</sub>H<sub>B</sub>OH), 2.80–2.64 (m, 2H, CH<sub>2</sub>Ph), 2.01–1.82 (m, 2H, CH<sub>2</sub>), 1.25 (d, *J* = 7.0 Hz, 12H, 4 x CHMe); <sup>13</sup>C NMR (100.6 MHz, CDCl<sub>3</sub>) δ 156.5 (C=O), 141.4 (*ipso*-Ph), 128.5 (Ph), 128.3 (Ph), 126.1 (Ph), 76.4 (CHO), 66.2 (CH<sub>2</sub>O), 46.3 (CHN), 45.6

(CHN), 33.1 (CH<sub>2</sub>), 31.9 (CH<sub>2</sub>). 21.3 (CHMe<sub>2</sub>) 20.6 (CHMe<sub>2</sub>). Spectroscopic data consistent with that reported in the literature.<sup>6</sup>

#### (S)-4-Phenylbutane-1,2-diol

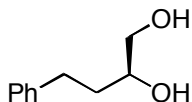

LiAlH<sub>4</sub> (175 mg, 4.55 mmol) was added portionwise to a stirred solution of alcohol (*S*)-**10** (259 mg, 0.89 mmol) in THF (20 mL) at 0 °C under Ar. The resulting solution was stirred and heated at reflux for 18 h. After being allowed to cool to rt, the solution was cooled to 0 °C and Na<sub>2</sub>SO<sub>4</sub>·10H<sub>2</sub>O (1.0 g) was added portionwise. The resulting suspension was then stirred at rt for 1 h. The solids were removed by filtration through a pad of Celite<sup>®</sup> and washed with CH<sub>2</sub>Cl<sub>2</sub> (25 mL), 1:1 CH<sub>2</sub>Cl<sub>2</sub>-MeOH (25 mL) and MeOH (25 mL). The combined organic extracts were evaporated under reduced pressure to give the crude product as a white oil. Purification by flash column chromatography on silica with CH<sub>2</sub>Cl<sub>2</sub>-MeOH (19:1) as eluent gave (*S*)-4-phenylbutane-1,2-diol (73 mg, 50%, 84:16 er by chiral HPLC) as a colourless oil, *R*<sub>F</sub>(19:1 CH<sub>2</sub>Cl<sub>2</sub>-MeOH) 0.2; <sup>1</sup>H NMR (400 MHz, CDCl<sub>3</sub>) δ 7.31-7.28 (m, 2H, Ph), 7.23-7.19 (m, 3H, Ph), 3.75-3.69 (m, 1H, CHOH), 3.65 (dd, *J* = 11.0, 3.0 Hz, 1H, CH<sub>A</sub>H<sub>B</sub>OH), 3.46 (dd, *J* = 11.0, 7.5 Hz, 1H, CH<sub>A</sub>H<sub>B</sub>OH), 2.83-2.65 (m, 2H), 1.79-1.72 (m, 2H); Chiral HPLC: Daicel Chiralcel OD, 1:4 v/v *i*PrOH-hexane, 0.5 mL min<sup>-1</sup>, 254 nm, 14.5 min [(*R*)] 18.5 min [(*S*)]. Spectroscopic data consistent with that reported in the literature.<sup>6</sup>

### (S)-Octahydropentalen-1-ol **12**

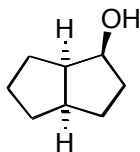

**12**

*s*-BuLi (1.46 mL of a 1.12 M solution in cyclohexanes, 1.64 mmol) was added dropwise to a stirred solution of diamine (*R,R*)-**4** (507 mg, 1.64 mmol) in Et<sub>2</sub>O (2 mL) at -78 °C under Ar. The resulting solution was stirred at -78 °C for 30 min and then a solution of cyclooctene oxide **11** (154 mg, 1.22 mmol) in Et<sub>2</sub>O (2 mL) was added dropwise over 2 min. The resulting solution was stirred at -78 °C for 5 h and then allowed to warm to rt and stirred at rt for 16 h. The solution was cooled to 0 °C and 2 M HCl<sub>(aq)</sub> (10 mL) was added. The two layers were separated and the aqueous layer was extracted with EtOAc (4 x 10 mL). The combined organic extracts were washed with saturated NaHCO<sub>3(aq)</sub> (10 mL), dried (MgSO<sub>4</sub>) and evaporated under reduced pressure to give the crude product as a colourless oil. Purification by flash column chromatography on silica with petrol-Et<sub>2</sub>O (7:3) as eluent gave alcohol **12** (141 mg, 92%, 50:50 er by chiral HPLC of the dinitrobenzoate) as a colourless oil, *R*<sub>F</sub>(1:1 petrol-Et<sub>2</sub>O) 0.3; <sup>1</sup>H NMR (400 MHz, CDCl<sub>3</sub>) δ 4.17-4.13 (m, 1H, *CHOH*), 2.45-2.35 (m, 2H, 2 x CH), 1.81-1.07 (m, 11H, 5 x CH<sub>2</sub> and OH). Spectroscopic data consistent with that reported in the literature.<sup>7</sup>

### 2,4-Dinitro-benzoic acid (*S*)-(octahydro-pentalen-1-yl) ester

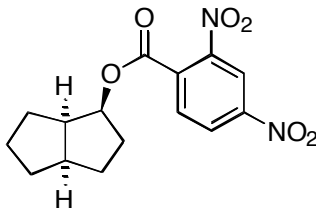

2,4-Dinitrobenzoic acid (170 mg, 0.81 mmol) was added in one portion to a stirred solution of alcohol **12** (68 mg, 0.54 mmol), DMAP (6 mg, 0.05 mmol) and DCC (133 mg, 0.65 mmol) in CH<sub>2</sub>Cl<sub>2</sub> (5 mL) under Ar at 0 °C. The resulting solution was stirred at rt for 72 h. Then, the solids were removed by filtration and washed with CH<sub>2</sub>Cl<sub>2</sub> (2 x 5 mL). The combined filtrate was evaporated to give the crude product as a

yellow solid. Purification by flash column chromatography on silica with petrol-Et<sub>2</sub>O (3:2) as eluent the gave ester (167 mg, 97%, 50:50 er by chiral HPLC) as a yellow oil,  $R_F$ (1:1 petrol-Et<sub>2</sub>O) 0.8; <sup>1</sup>H NMR (400 MHz, CDCl<sub>3</sub>) δ 8.76 (d,  $J$  = 2.0 Hz, 1H, ArCH), 8.53 (dd,  $J$  = 8.5, 2.0 Hz, 1H, ArCH), 7.96 (d,  $J$  = 8.5 Hz, 1H, ArCH), 5.37 (dd,  $J$  = 12.5, 6.5 Hz, 1H, CHO), 2.28-2.67 (m, 1H, CH), 2.59-2.46 (m, 1H, CH), 1.98-1.19 (m, 10H, CH<sub>2</sub>); Chiral HPLC: Daicel Chiralpak AD-H, 3:7 v/v MeOH-hexane + 0.2% *i*PrOH, 5 mL min<sup>-1</sup>, 254 nm, 0.92 min and 1.63 min (*ent*). Spectroscopic data consistent with that reported in the literature.<sup>7</sup>

### ***tert*-Butyldimethylphosphine borane **13****

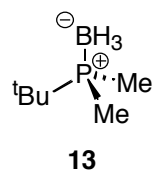

MeMgBr (46.5 mL of a 3 M solution in Et<sub>2</sub>O, 139.6 mmol) was added dropwise over 1 h to a stirred solution of *t*-butyldichlorophosphine (10.0 g, 62.9 mmol) in THF (120 mL) at -10 °C under Ar. The resulting cloudy solution was stirred at rt for 5 h and then cooled to -10 °C. Then, BH<sub>3</sub>•DMS (38.0 mL of a 2 M solution in THF, 76.0 mmol) was added dropwise over 20 min. The solution was stirred at rt for 1 h and poured onto a mixture of ice (150 g) and concentrated HCl<sub>(aq)</sub> (15 mL). The mixture was extracted with EtOAc (4 x 50 mL) and the combined organic extracts were dried (MgSO<sub>4</sub>) and evaporated under reduced pressure to give the crude product as a white solid. Purification by recrystallisation from hexane (40 mL) gave phosphine borane **13** (6.12 g, 74%) as a white solid, mp 163-164 °C (lit.,<sup>8</sup> 160-163 °C);  $R_F$ (4:1 petrol-Et<sub>2</sub>O) 0.4; <sup>1</sup>H NMR (400 MHz, CDCl<sub>3</sub>) δ 1.21 (d,  $J$  = 10.0 Hz, 6H, PMe), 1.13 (d,  $J$  = 14.0 Hz, 9H, CMe<sub>3</sub>), 0.41 (qd,  $J$  = 95.0, 13.0 Hz, 3H, BH<sub>3</sub>). Spectroscopic data consistent with that reported in the literature.<sup>8</sup>

**(*R*)-*P*-(2,2-Diphenyl-2-hydroxyethyl)-*P*-methyl-*tert*-butylphosphine borane (*R*)-14**

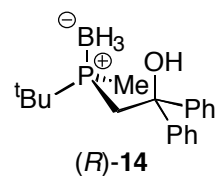

*s*-BuLi (1.00 mL of a 1.12 M solution in cyclohexanes, 1.49 mmol) was added dropwise to a stirred solution of diamine (*S,S*)-**4** (464 mg, 1.49 mmol) in Et<sub>2</sub>O (2 mL) at –78 °C under Ar. The resulting solution was stirred at –78 °C for 30 min and then a solution of phosphine borane **13** (138 mg, 1.05 mmol) in Et<sub>2</sub>O (2 mL) was added dropwise over 2 min. The resulting solution was stirred at –78 °C for 3 h. Then, a solution of benzophenone (229 mg, 1.29 mmol) in Et<sub>2</sub>O (1 mL) was added dropwise. The resulting mixture was allowed to warm to rt and stirred at rt for 16 h. 1 M HCl<sub>(aq)</sub> (2 mL) was added and the two layers were separated. The aqueous layer was extracted with Et<sub>2</sub>O (5 x 5 mL) and the combined organic extracts were dried (MgSO<sub>4</sub>) and evaporated under reduced pressure to give the crude product as a white solid. Purification by flash column chromatography on silica with petrol-EtOAc (95:5) as eluent gave alcohol (*R*)-**14** (309 mg, 99%, 60:40 er by chiral HPLC) as a white solid, mp 110-112 °C (lit.,<sup>9</sup> 116.5-117.5 °C); *R*<sub>F</sub>(95:5 petrol-EtOAc) 0.2; [α]<sub>D</sub> –2.5 (*c* 1.0 in CHCl<sub>3</sub>) (lit.,<sup>9</sup> [α]<sub>D</sub> –14.9 (*c* 0.47 in CHCl<sub>3</sub>) for (*R*)-**14** of 96:4 er); <sup>1</sup>H NMR (400 MHz, CDCl<sub>3</sub>) δ 7.55-7.44 (m, 4H, Ph), 7.38-7.28 (m, 4H, Ph), 7.28-7.20 (m, 2H, Ph), 4.58 (s, 1H, OH), 2.89 (t, *J* = 14.5 Hz, 1H C(OH)CH<sub>A</sub>H<sub>B</sub>), 2.68 (dd, *J* = 14.5, 7.0 Hz, 1H C(OH)CH<sub>A</sub>H<sub>B</sub>), 1.80 (d, *J* = 13.5 Hz, 9H, CMe<sub>3</sub>), 1.07-0.07 (m, 3H, BH<sub>3</sub>), 0.75 (d, *J* = 10.0 Hz, 3H, PMe); Chiral HPLC: Daicel Chiralcel OD, 1:19 v/v *i*-PrOH-hexane, 0.5 mL min<sup>–1</sup>, 254 nm, 10.5 min [(*R*)-**14**] 12.5 min [(*S*)-**14**]. Spectroscopic data consistent with that reported in the literature.<sup>10</sup>

**(S)-tert-Butyl 2-allylpyrrolidine-1-carboxylate **15****

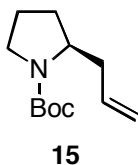

*s*-BuLi (0.98 mL of a 1.20 M solution in cyclohexane, 1.18 mmol) was added dropwise over 1 min to a stirred solution of the *N*-Boc pyrrolidine **7** (160  $\mu$ L, 0.91 mmol) and diamine (*S,S*)-**4** (366  $\mu$ L, 1.18 mmol) in Et<sub>2</sub>O (3.5 mL) at  $-78$  °C under Ar. The resulting solution was stirred at  $-78$  °C for 3 h. Then, CuCN $\cdot$ 2LiCl (758  $\mu$ L of a 0.6 M solution in THF, 0.46 mmol) was added dropwise and the resulting solution was stirred at  $-78$  °C for 1 h. Then, allyl bromide (142  $\mu$ L, 1.64 mmol) was added dropwise and the reaction mixture was allowed to warm to rt and stirred at rt for 16 h. NH<sub>4</sub>OH<sub>(aq)</sub> (0.5 mL), saturated NH<sub>4</sub>Cl<sub>(aq)</sub> (4.5 mL) and Et<sub>2</sub>O (5 mL) were added and the mixture stirred at rt for 20 min. The solids were removed by filtration through a pad of Celite<sup>®</sup> and the filter cake was washed with Et<sub>2</sub>O (5 mL). The two layers of the filtrate were separated and the blue aqueous layer was extracted with Et<sub>2</sub>O (3 x 20 mL). The combined organic extracts were dried (MgSO<sub>4</sub>) and evaporated under reduced pressure to give the crude product. Purification by flash column chromatography on silica with petrol-EtOAc (85:15) as eluent gave allyl pyrrolidine **15** (150 mg, 78%, 85:15 er by chiral HPLC) as a colourless oil, *R*<sub>F</sub>(9:1 petrol-EtOAc) 0.2;  $[\alpha]^{24}_{\text{D}} -35.1$  (*c* 0.95 in CHCl<sub>3</sub>) (lit.,<sup>11</sup>  $[\alpha]^{24}_{\text{D}} -32.4$  (*c* 1.56 in CHCl<sub>3</sub>) for (*S*)-**15** of  $\geq 99:1$  er); <sup>1</sup>H NMR (400 MHz, CDCl<sub>3</sub>)  $\delta$  5.74 (ddt, *J* = 17.5, 10.0, 7.0 Hz, 1H, CH=CH<sub>2</sub>), 5.05 (d, *J* = 17.5 Hz, 1H, *trans*-CH=CH<sub>A</sub>H<sub>B</sub>), 5.03 (d, *J* = 10.0 Hz, 1H, *cis*-CH=CH<sub>A</sub>H<sub>B</sub>), 3.88-3.73 (br m, 1H, CHN), 3.41-3.36 (m, 2H, CH<sub>2</sub>N), 2.55-2.42 (m, 1H, CH<sub>A</sub>H<sub>B</sub>CH=CH<sub>2</sub>), 2.16-2.05 (m, 1H, CH<sub>A</sub>H<sub>B</sub>CH=CH<sub>2</sub>), 1.94-1.66 (m, 4H, 2 x CH<sub>2</sub>), 1.46 (s, 9H, CMe<sub>3</sub>); Chiral HPLC: Chiralcel OD, 99:1 hexane:*i*-PrOH, 0.1 mLmin<sup>-1</sup>, 44.07 min [(*R*)-**15**], 47.38 min [(*S*)-**15**]. Spectroscopic data consistent with that reported in the literature.<sup>12</sup>

**(S)-Benzyl 2-allylpyrrolidine-1-carboxylate 16**

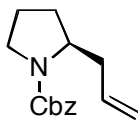

**16**

TFA (1 mL, 13.46 mmol) was added dropwise to a stirred solution of pyrrolidine (*S*)-**15** (145 mg, 0.69 mmol) in CH<sub>2</sub>Cl<sub>2</sub> (5 mL) at rt under Ar. The resulting solution was stirred at rt for 3 h and the solvent was evaporated under reduced pressure to give the crude product as a yellow oil. To a stirred solution of the crude product in CH<sub>2</sub>Cl<sub>2</sub> (2 mL) at 0 °C under Ar, Et<sub>3</sub>N (288 μL, 2.07 mmol) and benzyl chloroformate (128 μL, 0.90 mmol) were added dropwise. The resulting mixture was allowed to warm to rt and stirred at rt for 8 h. CH<sub>2</sub>Cl<sub>2</sub> (5 mL) and water (5 mL) were added and the two layers were separated. The aqueous layer was extracted with CH<sub>2</sub>Cl<sub>2</sub> (4 x 10 mL) and the combined organic extracts were dried (MgSO<sub>4</sub>) and evaporated under reduced pressure to give the crude product as a yellow oil. Purification by flash column chromatography on silica with petrol-EtOAc (9:1) as eluent gave allyl pyrrolidine (*S*)-**16** (168 mg, 99% over 2 steps) as a colourless oil,  $[\alpha]^{24}_{\text{D}} -30.2$  (*c* 1.15 in CHCl<sub>3</sub>) (lit.,<sup>13</sup>  $[\alpha]^{24}_{\text{D}} -38.7$  (*c* 1.13 in CHCl<sub>3</sub>) for (*S*)-**16** of  $\geq 99:1$  er); *R*<sub>F</sub>(9:1 petrol-EtOAc) 0.3; <sup>1</sup>H NMR (400 MHz, CDCl<sub>3</sub>) rotamers present  $\delta$  7.41-7.28 (m, 5H, Ph), 5.84-5.64 (m, 1H, CH=CH<sub>2</sub>), 5.23-4.97 (m, 4H, CH=CH<sub>2</sub> and CH<sub>2</sub>Ph), 3.98-3.85 (m, 1H, NCH), 3.53-3.36 (m, 2H, NCH<sub>2</sub>), 2.65-2.39 (m, 1H, CH<sub>A</sub>H<sub>B</sub>CH=CH<sub>2</sub>), 2.23-2.08 (m, 1H, CH<sub>A</sub>H<sub>B</sub>CH=CH<sub>2</sub>), 1.99-1.70 (m, 4H, 2 x CH<sub>2</sub>); <sup>13</sup>C NMR (100.6 MHz, CDCl<sub>3</sub>) approx 1:1 mixture of rotamers,  $\delta$  154.9 and 154.7 (C=O), 137.1 and 136.9 (*ipso*-Ph), 135.0 and 134.8 (CH=CH<sub>2</sub>), 128.4 and 127.8 and 127.7 (Ph), 117.3 and 117.2 (CH=CH<sub>2</sub>), 66.6 and 66.4 (CH<sub>2</sub>Ph), 57.2 and 56.7 (NCH), 46.8 and 46.5 (NCH<sub>2</sub>), 38.9 and 38.0 (CH<sub>2</sub>CH=CH<sub>2</sub>), 30.0 and 29.1 (CH<sub>2</sub>), 23.6 and 22.8 (CH<sub>2</sub>). Spectroscopic data consistent with that reported in the literature.<sup>13</sup>



**(S)-Benzyl 2-((E)-4-hydroxyhept-2-enyl)pyrrolidine-1-carboxylate **18****

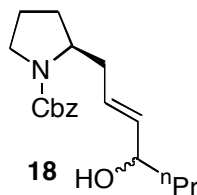

Grubbs' 2nd generation catalyst (28 mg, 0.033 mmol) was added in one portion to a stirred solution of the allyl-pyrrolidine **16** (160 mg, 0.65 mmol) and 1-hexen-3-ol **17** (157  $\mu$ L, 1.31 mmol) in  $\text{CH}_2\text{Cl}_2$  (4.5 mL) at rt under Ar. The resulting mixture was stirred at rt for 6 h before a second portion of Grubb's 2nd generation catalyst (10 mg, 0.012 mmol) was added. The resulting mixture was stirred at rt for a further 10 h. Then, the solvent was removed under reduced pressure to give the crude product as a brown oil. Purification by flash column chromatography on silica with petrol-EtOAc (7:3 to 1:1) as eluent gave alcohol **18** (161 mg, 78%) as a yellow oil,  $R_F$ (1:1 petrol-EtOAc) 0.53; IR (neat) 3435 (OH), 1695 (C=O), 1425 (C=C)  $\text{cm}^{-1}$ ;  $^1\text{H}$  NMR (400 MHz,  $\text{CDCl}_3$ ) mixture of diastereoisomers/rotamers  $\delta$  7.43-7.25 (m, 5H, Ph), 5.68-5.36 (m, 2H, CH=CH), 5.23-5.04 (m, 2H,  $\text{CH}_2\text{Ph}$ ), 4.10-3.97 (m, 1H, CHOH), 3.97-3.81 (m, 1H, NCH), 3.53-3.31 (m, 2H,  $\text{NCH}_2$ ), 2.57-2.32 (m, 1H,  $\text{CH}_\text{A}\text{H}_\text{B}\text{CH}=\text{CH}$ ), 2.23-2.05 (m, 1H,  $\text{CH}_\text{A}\text{H}_\text{B}\text{CH}=\text{CH}$ ), 1.98-1.67 (m, 4H, 2 x  $\text{CH}_2$ ), 1.58-1.21 (m, 4H, 2 x  $\text{CH}_2$ ), 0.92 (t,  $J = 7.5$  Hz, 3H, Me);  $^{13}\text{C}$  NMR (400 MHz,  $\text{CDCl}_3$ ) mixture diastereoisomers/rotamers  $\delta$  154.9 (C=O), 137.0 (*ipso*-Ph), 136.1 and 136.0 (=CH), 128.4 (Ph), 127.9 (Ph), 127.8 (Ph), 127.3 (=CH), 72.6 and 72.5 (COH), 66.7 and 66.4 ( $\text{CH}_2\text{Ph}$ ), 57.3 and 56.8 (NCH), 46.8 and 46.4 ( $\text{NCH}_2$ ), 39.3 ( $\text{CH}_2\text{CH}=\text{CH}$ ), 37.2 and 36.5 ( $\text{CH}_2$ ), 30.0 and 29.4 ( $\text{CH}_2$ ), 23.6 and 22.8 ( $\text{CH}_2$ ), 18.6 ( $\text{CH}_2$ ), 14.0 (Me). Spectroscopic data consistent with that reported in the literature.<sup>14</sup>

**(S)-Benzyl 2-((E)-4-oxohept-2-enyl)pyrrolidine-1-carboxylate 19**

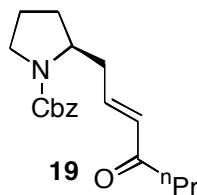

Dess-Martin periodinane (422 mg, 1.00 mmol) was added in one portion to a stirred solution of alcohol **18** (142 mg, 0.45 mmol) in  $\text{CH}_2\text{Cl}_2$  (4 mL) at rt under Ar. The resulting mixture was stirred at rt for 1 h. Then,  $\text{CH}_2\text{Cl}_2$  (7 mL) and a solution of  $\text{Na}_2\text{S}_2\text{O}_3$  (1.0 g) in 5%  $\text{NaHCO}_{3(\text{aq})}$  (10 mL) were added. The resulting mixture was stirred at rt for 15 min. The two layers were separated and the aqueous layer was extracted with  $\text{CH}_2\text{Cl}_2$  (3 x 10 mL). The combined organic extracts were dried ( $\text{Na}_2\text{SO}_4$ ) and evaporated under reduced pressure to give the crude product as a yellow oil. Purification by flash column chromatography on silica with petrol-EtOAc (85:15) as eluent gave ketone **19** (111 mg, 72%) as a colourless oil,  $[\alpha]_D^{24} -74.6$  (c 0.33 in  $\text{CHCl}_3$ );  $R_F$ (5:1 petrol-EtOAc) 0.36; IR (neat) 2962 (CH), 1697 (C=O), 1627 (C=O), 1411 (C=C)  $\text{cm}^{-1}$ ;  $^1\text{H}$  NMR (400 MHz,  $\text{CDCl}_3$ ) approx 2:3 mixture of rotamers  $\delta$  7.46-7.23 (m, 5H, Ph), 6.86-6.84 (m, 1H,  $\text{CH}=\text{CH}(\text{CO})$ ), 6.12 (d,  $J = 16.0$  Hz, 0.6H,  $\text{CH}=\text{CH}(\text{CO})$ ), 6.05 (d,  $J = 16.0$  Hz, 0.4H  $\text{CH}=\text{CH}(\text{CO})$ ), 5.15 (br s, 0.8H,  $\text{CH}_2\text{Ph}$ ), 5.13 (br s, 1.2H,  $\text{CH}_2\text{Ph}$ ), 4.08-3.94 (m, 1H, NCH), 3.55-3.34 (m, 2H,  $\text{NCH}_2$ ), 2.79-2.67 (m, 0.6H,  $\text{CH}_\text{A}\text{H}_\text{B}\text{CH}=\text{CH}$ ), 2.61-2.52 (m, 0.4H,  $\text{CH}_\text{A}\text{H}_\text{B}\text{CH}=\text{CH}$ ), 2.50 (t,  $J = 7.5$  Hz, 1.2H,  $\text{C}(\text{O})\text{CH}_2$ ), 2.45 (t,  $J = 7.0$  Hz, 0.8H,  $\text{C}(\text{O})\text{CH}_2$ ), 2.41-2.26 (m, 1H,  $\text{CH}_\text{A}\text{H}_\text{B}\text{CH}=\text{CH}$ ) 2.04-1.77 (m, 3H,  $\text{CH}_2$  and CH), 1.75 (m, 3H, CH and  $\text{CH}_2$ ), 0.93 (t,  $J = 7.5$  Hz, 3H, Me);  $^{13}\text{C}$  NMR (100.6 MHz,  $\text{CDCl}_3$ ) approx 2:3 mixture of rotamers  $\delta$  200.3 (C=O), 154.8 (C=O), 143.0 and 142.5 ( $\text{CH}=\text{CH}(\text{CO})$ ), 136.9 (*ipso*-Ph), 132.4 ( $\text{CH}=\text{CH}(\text{CO})$ ), 128.5 (Ph), 128.0 (Ph), 127.9 (Ph), 127.8 (Ph), 66.9 and 66.6 ( $\text{CH}_2\text{Ph}$ ), 56.7 and 56.1 (NCH), 46.8 and 46.5 ( $\text{NCH}_2$ ), 42.2 and 41.9 ( $\text{C}(\text{O})\text{CH}_2$ ), 37.6 and 36.8 ( $\text{CH}_2\text{CH}=\text{CH}$ ), 30.4 and 29.6 ( $\text{NCHCH}_2$ ), 23.6 and 22.9 ( $\text{NCH}_2\text{CH}_2$ ), 17.6 and 17.5 ( $\text{CH}_2\text{Me}$ ), 13.7 (Me); MS (ESI)  $m/z$  338  $[(\text{M} + \text{Na})^+, 100]$ , 316  $[(\text{M} + \text{H})^+, 33]$ ; HRMS (ESI)  $m/z$   $[\text{M} + \text{Na}]^+$  calcd for  $\text{C}_{19}\text{H}_{25}\text{NO}_3$ , 338.1732; found 338.1727.

**(-)-(5*R*,9*R*)-Octahydro-5-propylindolizine ((-)-indolizidine 167B))**

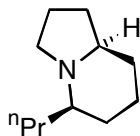

(-)-Indolizidine 167B

A suspension of 10% (w/w) Pd/C (40 mg, 0.038 mmol) in MeOH (2 mL) was added to stirred solution of ketone **19** (60 mg, 0.19 mmol) in MeOH (1 mL) at rt under N<sub>2</sub>. The flask was evacuated and back-filled with N<sub>2</sub> three times. Then, the flask was evacuated and back-filled with H<sub>2</sub>. The resulting mixture was stirred at rt under H<sub>2</sub> for 16 h. Then, CH<sub>2</sub>Cl<sub>2</sub> (20 mL) was added and the solids were removed by filtration through a pad of Celite<sup>®</sup> and washed with CH<sub>2</sub>Cl<sub>2</sub> (2 x 5 mL). The filtrate was evaporated under reduced pressure to give the crude product as a yellow/brown oil. Purification by flash column chromatography on a pad of Et<sub>3</sub>N-deactivated silica with petrol-EtOAc (1:1 → 0:1) as eluent gave (-)-indolizidine 167B (26 mg, 81%) as a yellow oil,  $[\alpha]_D^{24} -89.5$  (*c* 0.2 in CH<sub>2</sub>Cl<sub>2</sub>) (lit.,<sup>15</sup>  $[\alpha]_D^{24} -115$  (*c* 1.17 in CH<sub>2</sub>Cl<sub>2</sub>) for (-)-indolizidine 167B of  $\geq 99:1$  er); *R*<sub>F</sub>(1:1 petrol-EtOAc) on Et<sub>3</sub>N deactivated silica 0.2; <sup>1</sup>H NMR (400 MHz, CDCl<sub>3</sub>)  $\delta$  3.28 (td *J* = 9.0, 2.0 Hz, 1H, NCH), 2.06-1.54 (m, 10H, 4 x CH<sub>2</sub>, NCH and CH), 1.54-1.67 (m, 7H, CH and 3 x CH<sub>2</sub>), 0.90 (t, *J* = 7.0 Hz, 3H, Me); <sup>13</sup>C NMR (100.6 MHz, CDCl<sub>3</sub>)  $\delta$  65.2 (NCH), 63.7 (NCH), 51.3 (NCH<sub>2</sub>), 36.5 (CH<sub>2</sub>), 30.5 (CH<sub>2</sub>), 30.4 (CH<sub>2</sub>), 30.3 (CH<sub>2</sub>), 20.3 (CH<sub>2</sub>), 19.1 (CH<sub>2</sub>), 14.4 (Me). Spectroscopic data is consistent with that reported in the literature.<sup>15</sup>

**(*R*)-*tert*-Butyl 2-phenylpyrrolidine-1-carboxylate **20****

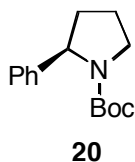

*s*-BuLi (1.32 mL of a 1.30 M solution in cyclohexane, 1.75 mmol) was added dropwise to a stirred solution of *N*-Boc pyrrolidine **7** (307  $\mu$ L, 1.75 mmol) and (-)-sparteine (402  $\mu$ L, 1.75 mmol) in Et<sub>2</sub>O (3.5 mL) at -78 °C under Ar. The resulting solution was stirred at -78 °C for 3 h. Then, ZnCl<sub>2</sub> (1.04 mL of a 1.0 M solution in Et<sub>2</sub>O, 1.04 mmol) was added dropwise and the resulting solution was stirred at -78 °C

for 30 min. Then, the solution was allowed to warm to rt over 15 min, followed by stirring at rt for 20 min. Then, bromobenzene (153  $\mu$ L, 1.46 mmol) and a mixture of  $t$ Bu<sub>3</sub>PHBF<sub>4</sub> (25 mg, 0.09 mmol) and Pd(OAc)<sub>2</sub> (16 mg, 0.07 mmol) were added. The resulting mixture was stirred at rt for 16 h. NH<sub>4</sub>OH<sub>(aq)</sub> (150  $\mu$ L) was added and the mixture stirred at rt for 1 h. The solids were removed by filtration through a pad of Celite<sup>®</sup> and washed with Et<sub>2</sub>O (20 mL). The filtrate was washed with 1 M HCl<sub>(aq)</sub> (15 mL) and water (2 x 15 mL), dried (MgSO<sub>4</sub>) and evaporated under reduced pressure to give the crude product as a yellow oil. Purification by flash column chromatography on silica with CH<sub>2</sub>Cl<sub>2</sub> as eluent gave pyrrolidine (*R*)-**20** (307 mg, 81%, 95:5 er by chiral HPLC) as a colourless oil that solidifies of standing, mp 58-60 °C (lit.,<sup>16</sup> 61.9-62.7 °C); [ $\alpha$ ]<sub>D</sub><sup>24</sup> +83.2 (*c* 0.7 in acetone) (lit.,<sup>16</sup> [ $\alpha$ ]<sub>D</sub><sup>24</sup> +85.3 (*c* 0.019 in acetone)); *R*<sub>F</sub>(CH<sub>2</sub>Cl<sub>2</sub>) 0.25; <sup>1</sup>H NMR (400 MHz, CDCl<sub>3</sub>) rotamers present  $\delta$  7.33-7.26 (m, 2H, Ph), 7.25-7.13 (m, 3H, Ph), 5.03-4.90 (br m, 0.33H, NCHPh), 4.83-4.70 (m, 0.66H, NCHPh), 3.72-3.45 (m, 2H, NCH<sub>2</sub>), 2.42-2.20 (br m, 1H, CH<sub>A</sub>H<sub>B</sub>), 1.99-1.77 (m, 3H, CH<sub>A</sub>H<sub>B</sub> and CH<sub>2</sub>), 1.46 (s, 3H, CMe<sub>3</sub>), 1.18 (s, 6H, CMe<sub>3</sub>); <sup>13</sup>C NMR (100.6 MHz, CDCl<sub>3</sub>) rotamers present  $\delta$  154.5 (C=O), 145.1 (*ipso*-Ph), 128.1 (2 x Ph), 125.5 (Ph), 79.1 (CMe<sub>3</sub>), 61.3 and 60.6 (CHPh), 47.0 (NCH<sub>2</sub>), 36.0 (CH<sub>2</sub>), 28.5 and 28.1 (CMe<sub>3</sub>), 23.4 (CH<sub>2</sub>), 23.39 (CH<sub>2</sub>); Chiral HPLC: Chiralpak AD, 99:1 hexane/*i*-PrOH, 0.5 mLmin<sup>-1</sup>, 9.40 min [(*R*)-**20**] and 11.84 min [(*S*)-**20**].<sup>16</sup>

**(2*S*,5*R*)-Methyl 5-phenylpyrrolidine-2-carboxylate *cis*-**22** and methyl 2-phenylpyrrolidine-2-carboxylate **23****

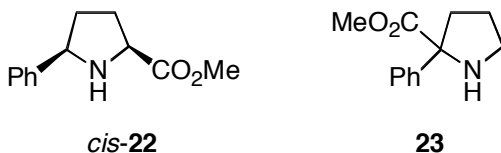

*s*-BuLi (1.28 mL of a 1.20 M solution in cyclohexane, 1.53 mmol) was added dropwise to a stirred solution of pyrrolidine (*R*)-**20** (250 mg, 0.96 mmol) and diamine (*S,S*)-**4** (475 mg, 1.53 mmol) in Et<sub>2</sub>O (2.5 mL) at -78 °C under Ar. The resulting solution was stirred at -78 °C for 6 h. Then, a stream of CO<sub>2</sub> was bubbled into the solution for 1 h and the solution was allowed to warm to rt and stirred at rt for 16 h. 1 M HCl<sub>(aq)</sub> (10 mL) and EtOAc (10 mL) were added and the two layers were separated. The aqueous layer was extracted with EtOAc (5 x 10 mL) and the combined organic extracts were dried (Na<sub>2</sub>SO<sub>4</sub>) and evaporated

under pressure to give the crude acids as a pale yellow oil. To a stirred solution of the crude acid in 1:1 MeOH-toluene (14 mL) at 0 °C under Ar trimethylsilyldiazomethane (534  $\mu$ L of a 2 M solution in hexanes, 1.07 mmol) was added dropwise. The resulting solution was stirred at rt for 1 h. Acetic acid (11  $\mu$ L, 0.2 mmol) was added dropwise and the solvent was evaporated under reduced pressure to give the crude methyl esters. To a stirred solution of the crude methyl esters in CH<sub>2</sub>Cl<sub>2</sub> (2.5 mL) at 0 °C under Ar TFA (250  $\mu$ L, 3.25 mmol) was added dropwise. The resulting solution was stirred at rt for 3 h. CH<sub>2</sub>Cl<sub>2</sub> (2.5 mL) and 1 M NaOH<sub>(aq)</sub> (5 mL) were added and the resulting layers were separated. The aqueous layer was extracted with CH<sub>2</sub>Cl<sub>2</sub> (3 x 10 mL) and the combined organic extracts were dried (MgSO<sub>4</sub>) and evaporated under reduced pressure to give the crude product as a yellow oil. Purification by flash column chromatography on silica with petrol-EtOAc (7:3) as eluent gave *cis*-pyrrolidine *cis*-**22** (51 mg, 33% over 3 steps,  $\geq$  99:1 er by chiral HPLC) as a pale yellow oil,  $[\alpha]_D^{24} +14.7$  (*c* 0.45 in CH<sub>2</sub>Cl<sub>2</sub>) (lit.,<sup>17</sup>  $[\alpha]_D^{24} +15.3$  (*c* 1.22 in CH<sub>2</sub>Cl<sub>2</sub>) for (2*S*,5*R*)-**22**); *R*<sub>F</sub>(7:3 petrol-EtOAc) 0.15; <sup>1</sup>H NMR (400 MHz, CDCl<sub>3</sub>)  $\delta$  7.45 (d, *J* = 7.5 Hz, 2H, *o*-Ph), 7.36 (t, *J* = 7.5 Hz, 2H, *m*-Ph), 7.30 (d, *J* = 7.5 Hz, 1H *p*-Ph), 4.31 (dd, *J* = 10.0, 6.0 Hz, 1H, NCH), 4.06 (dd, *J* = 9.0, 4.5 Hz, 1H, NCH), 3.80 (s, 3H, Me), 2.39-2.35 (m, 3H, CH<sub>2</sub> and CH<sub>A</sub>H<sub>B</sub>), 1.84-1.73 (m, 1H, CH<sub>A</sub>H<sub>B</sub>); <sup>13</sup>C NMR (100.6 MHz, CDCl<sub>3</sub>)  $\delta$  175.5 (C=O), 143.1 (*ipso*-Ph), 128.5 (Ph), 127.3 (Ph), 126.7 (Ph), 63.5 (NCH), 60.0 (NCH), 52.2 (Me), 34.1 (CH<sub>2</sub>), 30.5 (CH<sub>2</sub>). Chiral HPLC: Chiralpak AD 95:5 Hexane/*i*-PrOH, 0.5 mLmin<sup>-1</sup>, 22.71 min [(2*R*,5*S*)-**22**], 26.48 min [(2*S*,5*R*)-**22**] and amine **23** (18 mg, 22% over 3 steps) as a pale yellow oil,  $[\alpha]_D^{24} -7.1$  (*c* 0.9 in CHCl<sub>3</sub>); *R*<sub>F</sub>(7:3 petrol-EtOAc) 0.16; IR (neat) 2953 (CH), 2926 (CH), 2855 (CH), 1730 (C=O) cm<sup>-1</sup>; <sup>1</sup>H NMR (400 MHz, CDCl<sub>3</sub>)  $\delta$  7.45-7.50 (m, 2H, *o*-Ph), 7.33 (t, *J* = 7.5 Hz, 2H, *m*-Ph), 7.24 (t, *J* = 7.5 Hz, 1H, *p*-Ph), 3.69 (s, 3H, OMe), 3.16-3.06 (m, 2H, NCH<sub>2</sub>), 2.76 (ddd, *J* = 12.5, 8.0, 5.0 Hz, 1H, NC(Ph)CH<sub>A</sub>H<sub>B</sub>), 2.59-1.97 (br m, 1H, NH), 2.09 (dt, *J* = 12.5, 8.5 Hz, 1H, NC(Ph)CH<sub>A</sub>H<sub>B</sub>), 1.95-1.76 (m, 2H, CH<sub>2</sub>); <sup>13</sup>C NMR (100.6 MHz, CDCl<sub>3</sub>)  $\delta$  176.0 (C=O), 142.6 (*ipso*-Ph), 128.2 (Ph), 127.2 (Ph), 126.0 (Ph), 72.2 (NCPh), 52.7 (OMe), 45.7 (NCH<sub>2</sub>), 36.6 (CH<sub>2</sub>), 24.5 (CH<sub>2</sub>); MS (ESI) *m/z* 228 [(M + Na)<sup>+</sup>, 5], 206 [(M + H)<sup>+</sup>, 20], 146 [(M - CO<sub>2</sub>Me)<sup>+</sup>, 100]; HRMS (ESI) *m/z* [M + H]<sup>+</sup> calcd for C<sub>12</sub>H<sub>15</sub>NO<sub>2</sub>, 206.1181; found 205.1176. Spectroscopic data of *cis*-**22** consistent with that reported in the literature.<sup>17</sup>

**(2*R*,5*R*)-Methyl 5-phenylpyrrolidine-2-carboxylate *trans*-**24** and methyl 2-phenylpyrrolidine-2-carboxylate **23****

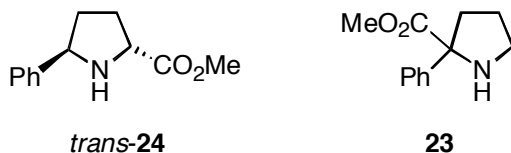

*s*-BuLi (1.50 mL of a 1.20 M solution in cyclohexane, 1.80 mmol) was added dropwise to a stirred solution of pyrrolidine (*R*)-**20** (294 mg, 1.13 mmol) and (–)-sparteine (413  $\mu$ L, 1.80 mmol) in Et<sub>2</sub>O (2.5 mL) at –78 °C under Ar. The resulting solution was stirred at –78 °C for 6 h. Then, a stream of CO<sub>2</sub> was bubbled into the solution for 1 h and the solution was allowed to warm to rt and stirred at rt for 16 h. 1 M HCl<sub>(aq)</sub> (10 mL) and EtOAc (10 mL) were added and the two layers were separated. The aqueous layer was extracted with EtOAc (5 x 10 mL) and the combined organic extracts were dried (Na<sub>2</sub>SO<sub>4</sub>) and evaporated under pressure to give the crude acids as a pale yellow oil. To a stirred solution of the crude acids 1:1 MeOH-toluene (7 mL) at 0 °C under Ar, trimethylsilyldiazomethane (713  $\mu$ L of a 2 M solution in hexanes, 1.42 mmol) was added dropwise. The resulting solution was stirred at rt for 1 h. Acetic acid (13  $\mu$ L, 0.23 mmol) was added dropwise and the solvent was evaporated under reduced pressure to give the crude methyl esters. To a stirred solution of the crude methyl esters in CH<sub>2</sub>Cl<sub>2</sub> (3 mL) at 0 °C under Ar, TFA (300  $\mu$ L, 3.89 mmol) was added dropwise. The resulting solution was stirred at rt for 2 h. CH<sub>2</sub>Cl<sub>2</sub> (5 mL) and 1 M NaOH<sub>(aq)</sub> (5 mL) were added and the two layers were separated. The aqueous layer was extracted with CH<sub>2</sub>Cl<sub>2</sub> (4 x 5 mL) and the combined organic extracts were dried (MgSO<sub>4</sub>) and evaporated under reduced pressure to give the crude product as a yellow oil. Purification by flash column chromatography on silica with petrol-EtOAc (7:3) as eluent gave *trans*-pyrrolidine *trans*-**24** (67 mg, 27% over 3 steps) as a pale yellow oil,  $[\alpha]_D^{24} +84.8$  (*c* 0.7 in CH<sub>2</sub>Cl<sub>2</sub>) (lit.,<sup>18</sup>  $[\alpha]_D^{24} +82.0$  (*c* 1.00 in CH<sub>2</sub>Cl<sub>2</sub>) for (2*R*,5*R*)-**24**); *R*<sub>F</sub>(7:3 petrol-EtOAc) 0.2; <sup>1</sup>H NMR (400 MHz, CDCl<sub>3</sub>)  $\delta$  7.41–7.36 (m, 2H, *o*-Ph), 7.33 (t, *J* = 7.5 Hz, 2H, *m*-Ph), 7.24 (t, *J* = 7.5 Hz, 1H *p*-Ph), 4.37 (dd, *J* = 8.5, 6.0 Hz, 1H, NCH), 4.06 (dd, *J* = 8.5, 6.0 Hz, 1H, NCH), 3.77 (s, 3H, Me), 2.36 (dtd, *J* = 13.0, 8.5, 4.0 Hz, 1H, CH), 2.21 (dddd, *J* = 12.0, 8.0, 6.5, 4.0, 0.5 Hz, 1H, CH), 2.00 (dddd, *J* = 13.0, 8.5, 8.0, 6.0 Hz, 1H, CH), 1.75 (dq, *J* = 12.0, 8.5 Hz, 1H, CH); <sup>13</sup>C NMR (100.6 MHz, CDCl<sub>3</sub>)  $\delta$  176.3 (C=O), 144.3 (*ipso*-Ph), 128.3 (Ph), 126.8 (Ph), 126.4 (Ph), 61.7 (NCH), 59.4 (NCH), 52.1 (OMe), 34.5 (CH<sub>2</sub>), 29.7 (CH<sub>2</sub>) and **23** (44 mg, 27% over 3 steps) as a pale

yellow oil,  $[\alpha]_{\text{D}}^{24} -44.5$  (c 0.05 in  $\text{CHCl}_3$ ). Spectroscopic data for *trans*-**24** consistent with that reported in the literature.<sup>19</sup>

# Representative GC/HPLC data

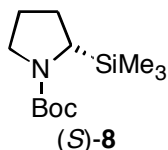

Data File C:\HPCHEM\1\DATA\GJG1205\MMCA0119.D

Sample Name: 1B

```
=====
Injection Date   : 4/21/2006 12:04:13 PM
Sample Name      : 1B
Acq. Operator    : darren
Location         : Vial 1
Inj              : 1
Inj Volume       : Manually

Acq. Method      : C:\HPCHEM\1\METHODS\GJG1.M
Last changed     : 4/21/2006 9:51:34 AM by darren
                  (modified after loading)
Analysis Method  : C:\HPCHEM\1\METHODS\GJG1.M
Last changed     : 4/21/2006 2:10:50 PM by darren
                  (modified after loading)
=====
```

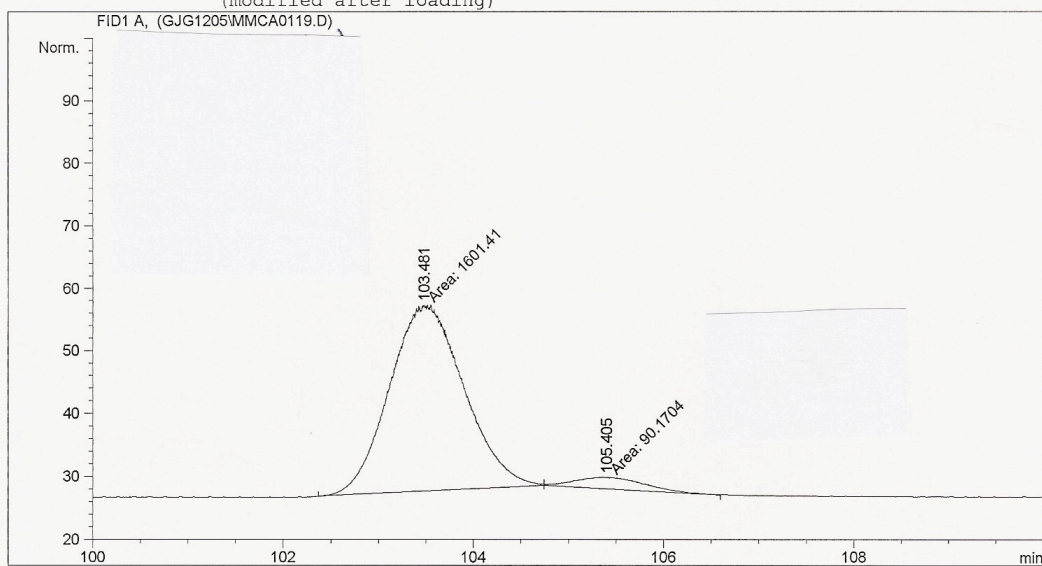

## Area Percent Report

```
=====
Sorted By       : Signal
Multiplier      : 1.0000
Dilution        : 1.0000
Sample Amount   : 1.00000 [ng/ul] (not used in calc.)
Use Multiplier & Dilution Factor with ISTDs
=====
```

Signal 1: FID1 A,

| Peak # | RetTime [min] | Type | Width [min] | Area [pA*s] | Height [pA] | Area %   |
|--------|---------------|------|-------------|-------------|-------------|----------|
| 1      | 2.496         | BV   | 0.0441      | 146.20901   | 50.06079    | 0.01364  |
| 2      | 2.626         | VV   | 0.0238      | 175.93367   | 115.16186   | 0.01641  |
| 3      | 2.706         | VB S | 0.0862      | 1.07018e6   | 1.55609e5   | 99.81071 |
| 4      | 3.426         | BV X | 0.0337      | 2.18733     | 9.94188e-1  | 0.00020  |
| 5      | 7.192         | BP   | 0.0796      | 1.45502     | 2.84901e-1  | 0.00014  |
| 6      | 69.304        | VV   | 0.2796      | 8.35262     | 3.56197e-1  | 0.00078  |
| 7      | 69.444        | VB   | 0.1623      | 3.89431     | 2.90738e-1  | 0.00036  |
| 8      | 103.481       | MM   | 0.9034      | 1601.40881  | 29.54518    | 0.14936  |
| 9      | 105.405       | MM   | 0.8205      | 90.17042    | 1.83152     | 0.00841  |

Totals : 1.07220e6 1.55808e5

Instrument 1 4/21/2006 2:17:38 PM darren

Page 1 of 2



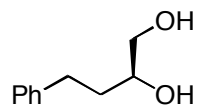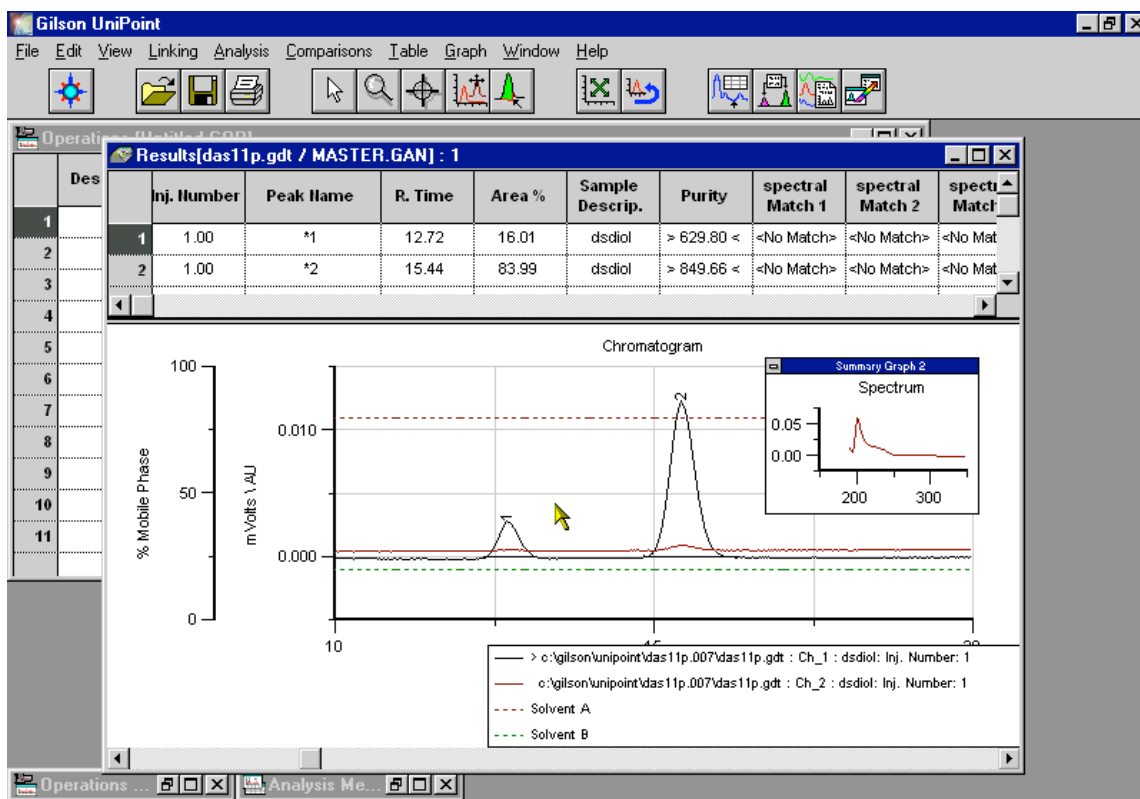

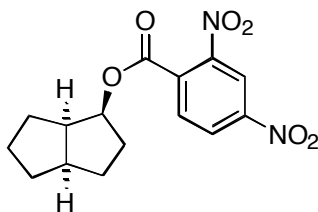

10/08/2006 16:38:59  
 Chromatogram Name: 59M-0000-556-001\_opt\_1  
 Method Name: 59M-0000-556-001\_opt  
 Operator: John Burnett

Vial Number: 9  
 Injection Volume: 10.000 ul

Sample Name: 59M-0000-556-001  
 Column: AD-H  
 Mobile Phase: 30%MeOH/IPAm  
 Flow: 5 (ml/min)  
 Pressure: 100 (bar)  
 Temperature: 35 (C)  
 Wavelength: 220 (nm)

Comments: 30%MeOH(0.2%IPAm), AD-H

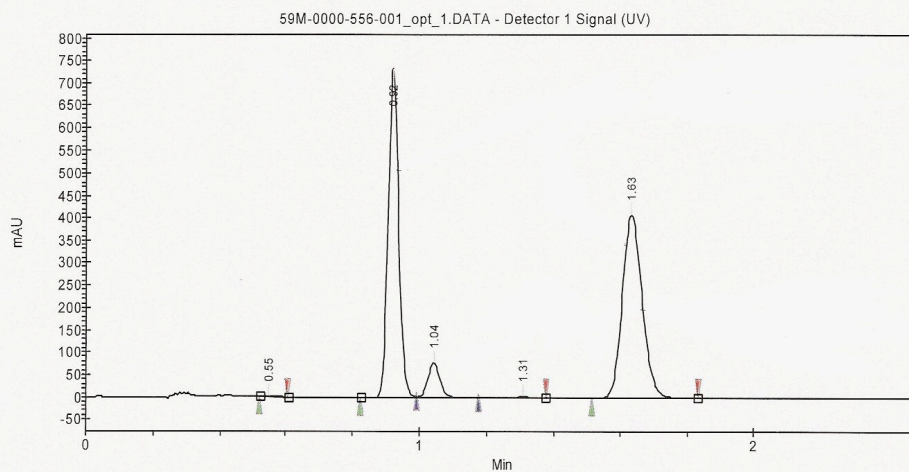

| Index | Time  | Width 10% | Height | Area      | Area    |
|-------|-------|-----------|--------|-----------|---------|
|       | [Min] | [Min]     | [mAU]  | [mAU*min] | [%]     |
| 1     | 0.55  | 0.07      | 2.54   | 0.11      | 0.186   |
| 2     | 0.92  | 0.06      | 733.55 | 26.92     | 46.134  |
| 3     | 1.04  | 0.07      | 76.90  | 3.30      | 5.659   |
| 4     | 1.31  | 0.12      | 2.59   | 0.16      | 0.275   |
| 5     | 1.63  | 0.12      | 407.16 | 27.86     | 47.746  |
| Total |       |           |        | 58.35     | 100.000 |

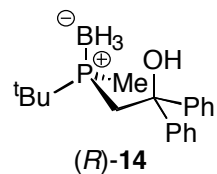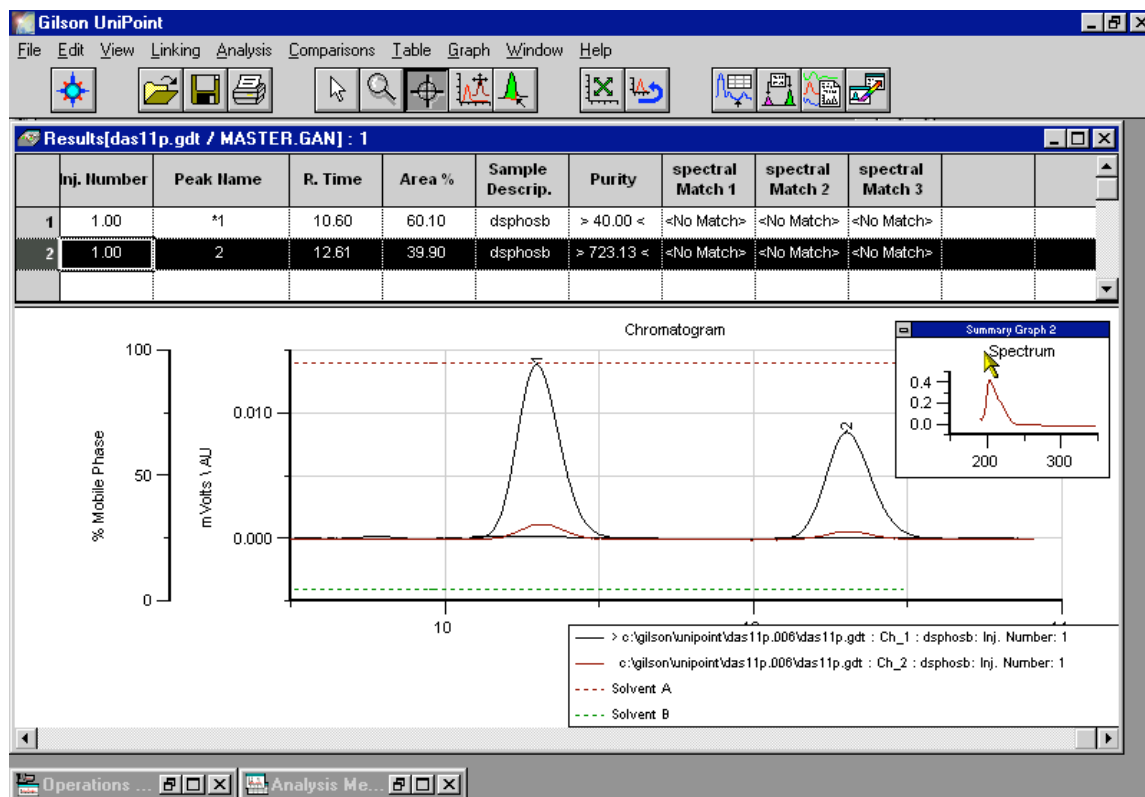

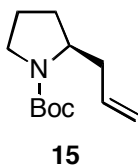

Data File C:\CHEM32\1\DATA\DARREN\STXDALLYLPYTYROLIDINERUN1.D  
Sample Name: DS8.83.Prun1

```
=====
Acq. Operator   : Darren
Acq. Instrument : Instrument 1           Location : Vial 1
Injection Date  : 8/20/2007 12:43:26 PM
Acq. Method     : C:\CHEM32\1\METHODS\DARREN\ALLYLPYRROLIDINEO.5EQCU.M
Last changed    : 8/20/2007 12:42:13 PM by Darren
Analysis Method : C:\CHEM32\1\DATA\DARREN\STXDALLYLPYTYROLIDINERUN1.D\DA.M (
                  ALLYLPYRROLIDINEO.5EQCU.M)
Last changed    : 8/20/2007 1:49:12 PM by Darren
Method Info     : allylbocpyrrolidine method 2

Sample Info     : OD column 0.1 ml/min flow, 1:99 IPA:Hexane, 2 bar, ds8
                  /83/prun1
=====
```

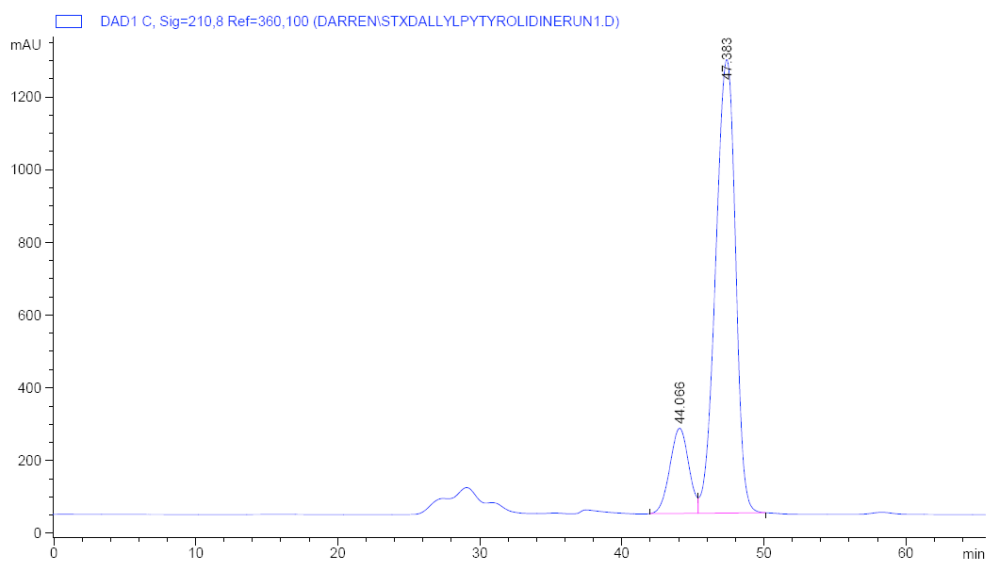

# Area Percent Report

```
Sorted By      : Signal
Multiplier     : 1.0000
Dilution       : 1.0000
Use Multiplier & Dilution Factor with ISTDs
```

Signal 1: DAD1 C, Sig=210,8 Ref=360,100

| Peak # | RetTime [min] | Type | Width [min] | Area [mAU*s] | Height [mAU] | Area %  |
|--------|---------------|------|-------------|--------------|--------------|---------|
| 1      | 44.066        | BV   | 1.4335      | 2.17321e4    | 234.43938    | 15.1971 |
| 2      | 47.383        | VB   | 1.5488      | 1.21270e5    | 1246.79138   | 84.8029 |

Totals : 1.43002e5 1481.23076

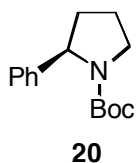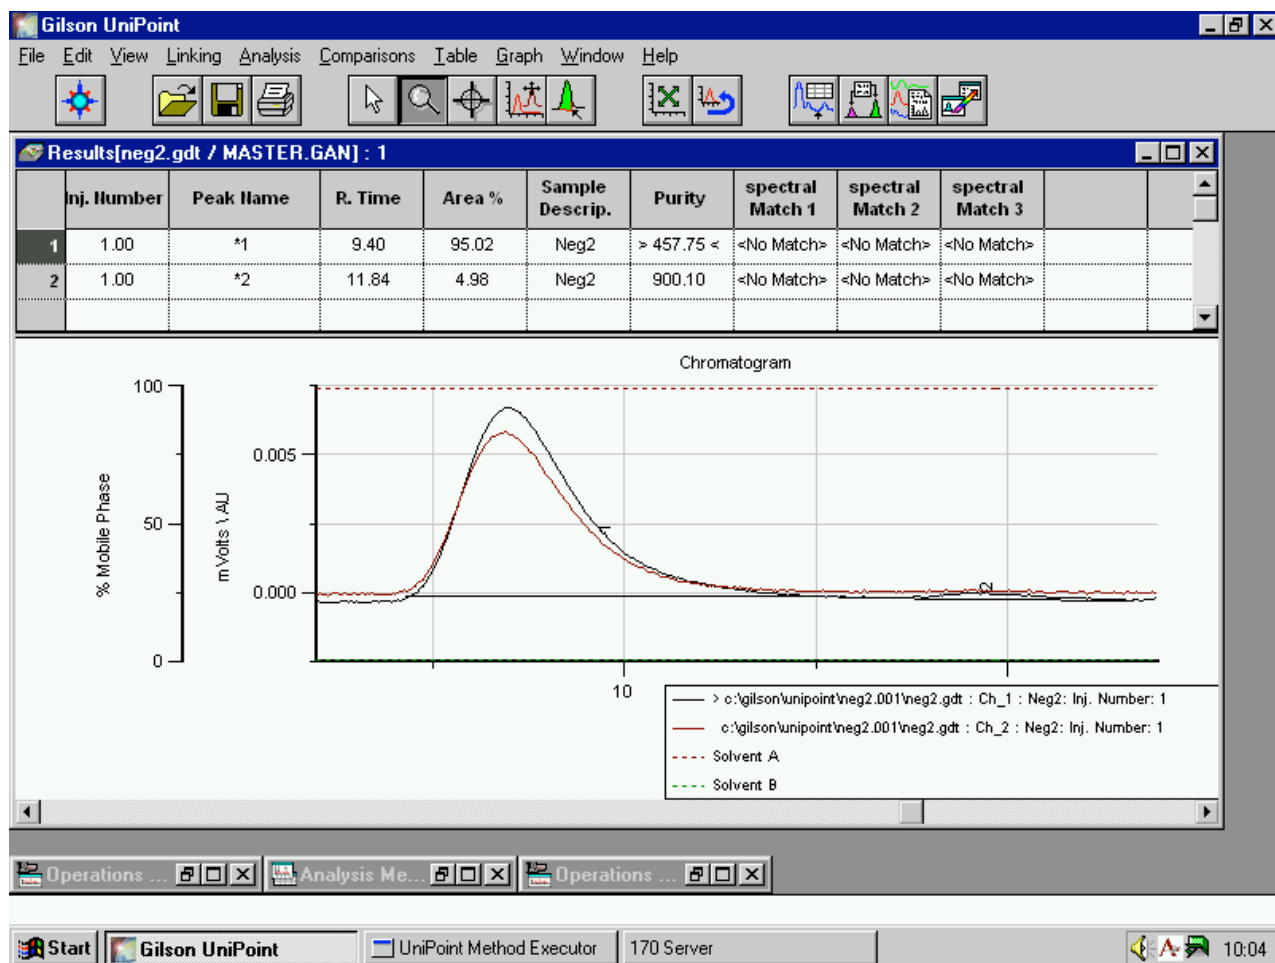

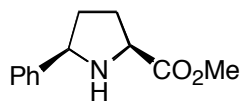

*cis-22*

Data File C:\CHEM32\1\DATA\DARREN\RP66803RUN4.D  
Sample Name: ds other/p4run1

```
=====
Acq. Operator   : Darren
Acq. Instrument : Instrument 1                      Location : Vial 1
Injection Date  : 7/27/2007 2:44:24 PM
Acq. Method     : C:\CHEM32\1\METHODS\DARREN\RP66803STUFF1.M
Last changed    : 7/27/2007 2:33:33 PM by Darren
                  (modified after loading)
Analysis Method : C:\CHEM32\1\DATA\DARREN\RP66803RUN4.D\DA.M (RP66803STUFF1.M)
Last changed    : 9/21/2007 4:57:54 PM by Jule
                  (modified after loading)
Method Info     : RP 66803NH
Sample Info     : AD column 0.5 ml/min flow, 5:95 IPA:Hexane, 11 bar ds 8
                  /other
=====
```

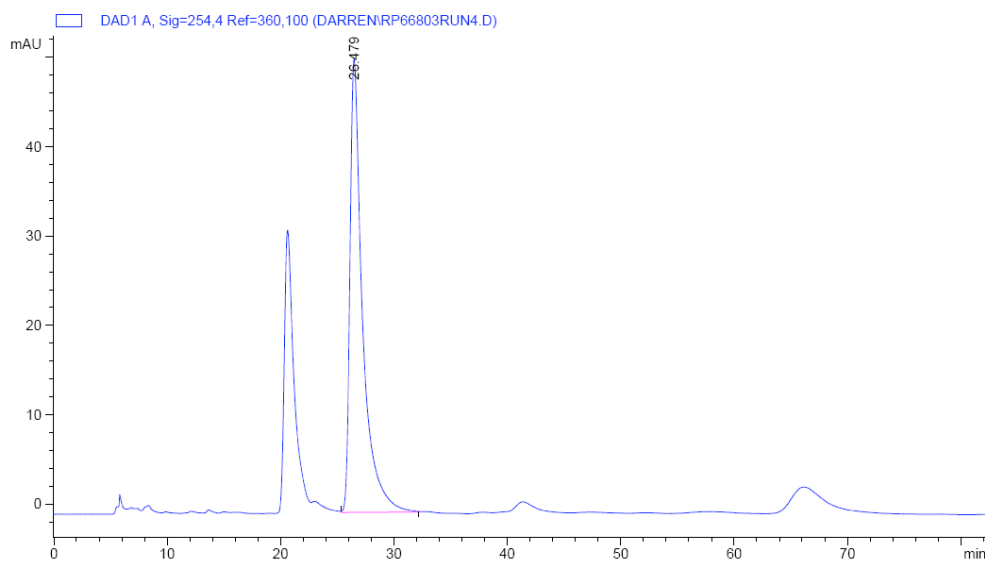

Area Percent Report

```
=====
Sorted By      : Signal
Multiplier     : 1.0000
Dilution       : 1.0000
Use Multiplier & Dilution Factor with ISTDs
=====
```

Signal 1: DAD1 A, Sig=254,4 Ref=360,100

| Peak # | RetTime [min] | Type | Width [min] | Area [mAU*s] | Height [mAU] | Area %   |
|--------|---------------|------|-------------|--------------|--------------|----------|
| 1      | 26.479        | BB   | 1.1078      | 3913.66919   | 50.74343     | 100.0000 |

Totals : 3913.66919 50.74343

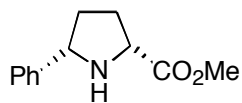

***ent-cis-22***  
independently  
synthesised

Data File C:\CHEM32\1\DATA\DARREN\RP66803RUN3.D  
Sample Name: ds 8.71/p4run1

```
=====
Acq. Operator   : Darren
Acq. Instrument : Instrument 1                      Location : Vial 1
Injection Date  : 7/27/2007 1:27:03 PM
Acq. Method     : C:\CHEM32\1\METHODS\DARREN\RP66803STUFF1.M
Last changed    : 7/27/2007 1:25:13 PM by Darren
                  (modified after loading)
Analysis Method : C:\CHEM32\1\DATA\DARREN\RP66803RUN3.D\DA.M (RP66803STUFF1.M)
Last changed    : 9/21/2007 4:59:48 PM by Julie
                  (modified after loading)
Method Info     : RP 66803NH

Sample Info     : AD column 0.5 ml/min flow, 5:95 IPA:Hexane, 11 bar ds 8
                  /71/p4
=====
```

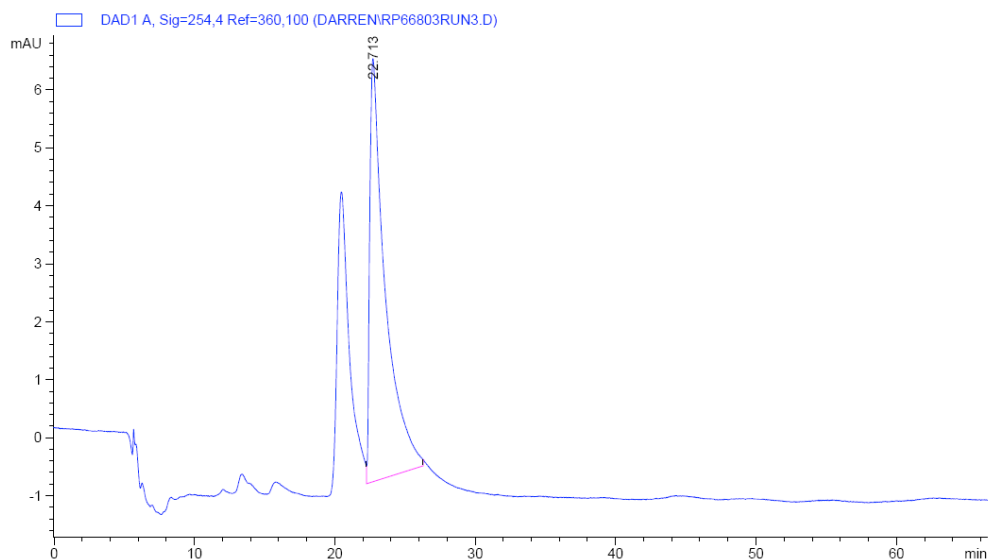

=====  
Area Percent Report  
=====

```
Sorted By      : Signal
Multiplier     : 1.0000
Dilution       : 1.0000
Use Multiplier & Dilution Factor with ISTDs
```

Signal 1: DAD1 A, Sig=254,4 Ref=360,100

| Peak # | RetTime [min] | Type | Width [min] | Area [mAU*s] | Height [mAU] | Area %   |
|--------|---------------|------|-------------|--------------|--------------|----------|
| 1      | 22.713        | VB   | 1.0403      | 560.62384    | 7.29767      | 100.0000 |

Totals :                      560.62384      7.29767

## References for supporting information:

- (1) Larrow, J. F.; Jacobsen, E. N. *Org. Synth.* **1997**, 75, 1.
- (2) Kizirian, J.-C.; Cabello, N.; Pinchard, L.; Caille, J.-C.; Alexakis, A. *Tetrahedron* **2005**, 61, 8939.
- (3) Cabello, N.; Kizirian, J.-C.; Gille, S.; Alexakis, A.; Bernardinelli, G.; Pinchard, L.; Caille, J.-C. *J. Org. Chem.* **2005**, 70, 4835.
- (4) Hoffmann, R. W.; Klute, W.; Dress, R. K.; Wenzel, A. *J. Chem. Soc., Perkin Trans. 2* **1995**, 1721.
- (5) Kerrick, S. T.; Beak, P. *J. Am. Chem. Soc.* **1991**, 113, 9708.
- (6) McGrath, M. J.; O'Brien, P. *Synthesis* **2006**, 2233.
- (7) Hodgson, D. M.; Lee, G. P.; Marriot, R. E.; Thompson, A. J.; Wisedale, R.; Witherington, J. *J. Chem. Soc., Perkins Trans 1* **1998**, 2151.
- (8) Crepy, K. V. L.; Imamoto, T. *Org. Synth.* **2005**, 52, 22.
- (9) Muci, A. R.; Campos, K. R.; Evans, D. A. *J. Am. Chem. Soc.* **1995**, 117, 9075.
- (10) McGrath, M. J.; O'Brien, P. *J. Am. Chem. Soc.* **2005**, 127, 16378.
- (11) Park, S. H.; Kang, H. J.; S., K.; Park, S.; Chang, S. *Tetrahedron: Asymmetry* **2001**, 12, 2621.
- (12) Coldham, I.; Fernández, J. C.; Snowden, D. J. *Tetrahedron Lett.* **1999**, 40, 1819.
- (13) Takahata, H.; Kubota, M.; Momose, T. *Tetrahedron: Asymmetry* **1997**, 8, 2801.
- (14) Peroche, S.; Remuson, R.; Gelas-Mialhe, Y.; Gramain, J.-C.; *Tetrahedron Lett.* 2001, 4617. *Tetrahedron Lett.* **2001**, 42, 4617.
- (15) Fleurant, A.; Cèlèrier, J. P.; Lhommet, G. *Tetrahedron: Asymmetry* **1992**, 3, 695.
- (16) Campos, K. R.; Klapars, A.; Waldman, J. H.; Dormer, P. G.; Chen, C. Y. *J. Am. Chem. Soc.* **2006**, 128, 3538.
- (17) Haddad, M.; Imoga, H.; Larchevêque, M. *J. Org. Chem.* **1998**, 63, 5680.
- (18) Davis, F. A.; Fang, T.; Goswami, R. *Org. Lett.* **2002**, 4, 1599.
- (19) Severino, E. A.; Costenaro, E. R.; Garcia, A. L. L.; Correia, C. R. D. *Org. Lett.* **2003**, 5, 305.
